# Supplementary material for: Prioritizing Health Care Strategies to Reduce Childhood Mortality
Source: PubMed Central journal article supplement (PMC9587481; doi:10.1001/jamanetworkopen.2022.37689), 2022-10-21
Supplement: jamanetwopen-e2237689-s001.pdf [file jamanetwopen-e2237689-s001.pdf]

## Supplemental Online Content

Madewell ZJ, Whitney CG, Velaphi S, et al; Child Health and Mortality Prevention Surveillance Network. Prioritizing health care strategies to reduce childhood mortality. *JAMA Netw Open*. 2022;5(10):e2237689. doi:10.1001/jamanetworkopen.2022.37689

**eFigure 1.** Flowchart of Enrolled Deaths From CHAMPS Sites Between December 2016 and December 2021 With MITS and Consent Only for Verbal Autopsy and Clinical Abstraction (Non-MITS) and Were Included in the Analysis

**eFigure 2.** Proportion of the 5 Most Frequent Causes of Death Anywhere in the Causal Pathway That Were Deemed Preventable by the Expert Determination of Cause of Death Panel for Neonatal and Infant and Child Deaths, December 2016 to December 2021

**eFigure 3.** Most Frequent Causes of Death Anywhere in the Causal Chain for Which the Optimal Health System Improvement Categories Were Recommended to Prevent Death for Each Age Group, December 2016 to December 2021

**eFigure 4.** Optimal Combinations of Health System Improvement Categories That Could Have Prevented the Most Deaths Across All Sites by Age Group, December 2016 to December 2021

**eFigure 5.** Proportion of the 5 Most Frequent Causes of Death That Could Have Been Prevented for the Optimal Combinations of Health System Improvement Categories That Could Have Prevented the Most Deaths Across All Sites by Age Group, December 2016 to December 2021

**eFigure 6.** Alluvial Plot of the Top 20 Most Recommended Interventions Associated With Improved Clinical Management or Improved Antenatal and Obstetric Care Across All Age Groups, December 2016 to December 2021

**eTable 1.** Characteristics of Deaths Enrolled in CHAMPS, December 2016 to December 2021

**eTable 2.** The 10 Most Frequent Causes of Death by Age Group and Site, December 2016 to December 2021

**eTable 3.** Proportion of Deaths That Were Deemed Preventable by Age Group and Site, December 2016 to December 2021

**eTable 4.** Specific Public Health Actions Recommended by the Expert Determination of Cause of Death Panel to Prevent Deaths by Age Group

**eTable 5.** Number and Proportion of Deaths of Any Cause That Could Have Been Prevented for Each Single Health System Improvement Category Assuming (A1) All Recommendations Given for a Single Death Are Necessary to Prevent That Death, (A2) Deaths Would be Reduced Proportionally for Every Category Implemented, and (A3) Any Single Category Among All Categories Recommended for Each Death Is Sufficient to Prevent that Death, by Site and Age Group, December 2016 to December 2021

**eTable 6.** Number and Proportion of Deaths That Could Have Been Prevented From the Optimal Combinations of Health System Improvement Categories Assuming All Recommendations Given for a Single Death Are Necessary to Prevent That Death by Site and Age Group, December 2016 to December 2021

**eTable 7.** The Number and Proportion of Deaths for Each of the Top 5 Causes of Death for Each Age Group That Could Have Been Prevented for the Top Combination of 1 to 3 Health System Improvement Categories, Assuming All the Recommendations Given for a Single Death Are Necessary to Prevent That Death and the Death Would Be Prevented When Any Single Cause of Death Was Prevented, December 2016 to December 2021

**eTable 8.** The Number and Proportion of Deaths for Each of the Top 5 Causes of Death for Each Age Group That Could Have Been Prevented for the Top Combination of 1 to 3 Health System Improvement Categories,

Assuming All the Recommendations Given for a Single Death Are Necessary to Prevent That Death, With Deaths Weighted by Giving 50% to the Underlying Cause With the Remaining Weight Distributed Evenly Among the Other Causes, December 2016 to December 2021

**eTable 9.** The Number and Proportion of Deaths for Each of the Top 5 Causes of Death for Each Age Group That Could Have Been Prevented for the Top Combination of 1 to 3 Health System Improvement Categories, Assuming All the Recommendations Given for a Single Death Are Necessary to Prevent That Death, With Deaths Weighted Using a Causal Chain Approach With Greater Weight Given to Underlying, Comorbid, and Immediate Causes of Death, Respectively, December 2016 to December 2021

**eMethods.** Statistical Analysis

This supplemental material has been provided by the authors to give readers additional information about their work.

**eFigure 1. Flowchart of Enrolled Deaths From CHAMPS Sites Between December 2016 and December 2021 With MITS and Consent Only for Verbal Autopsy and Clinical Abstraction (Non-MITS) and Were Included in the Analysis**

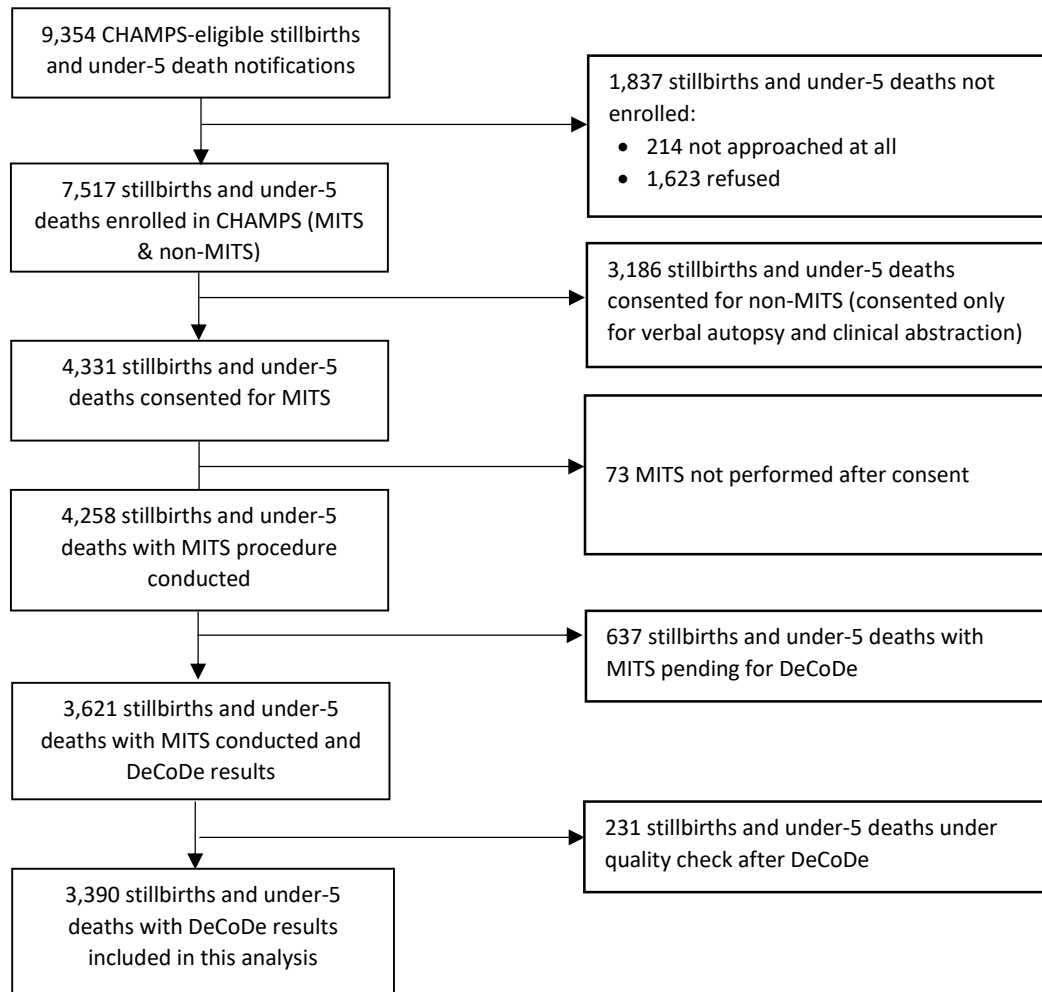

**eFigure 2. Proportion of the 5 Most Frequent Causes of Death Anywhere in the Causal Pathway That Were Deemed Preventable by the Expert Determination of Cause of Death Panel for Neonatal and Infant and Child Deaths, December 2016 to December 2021**

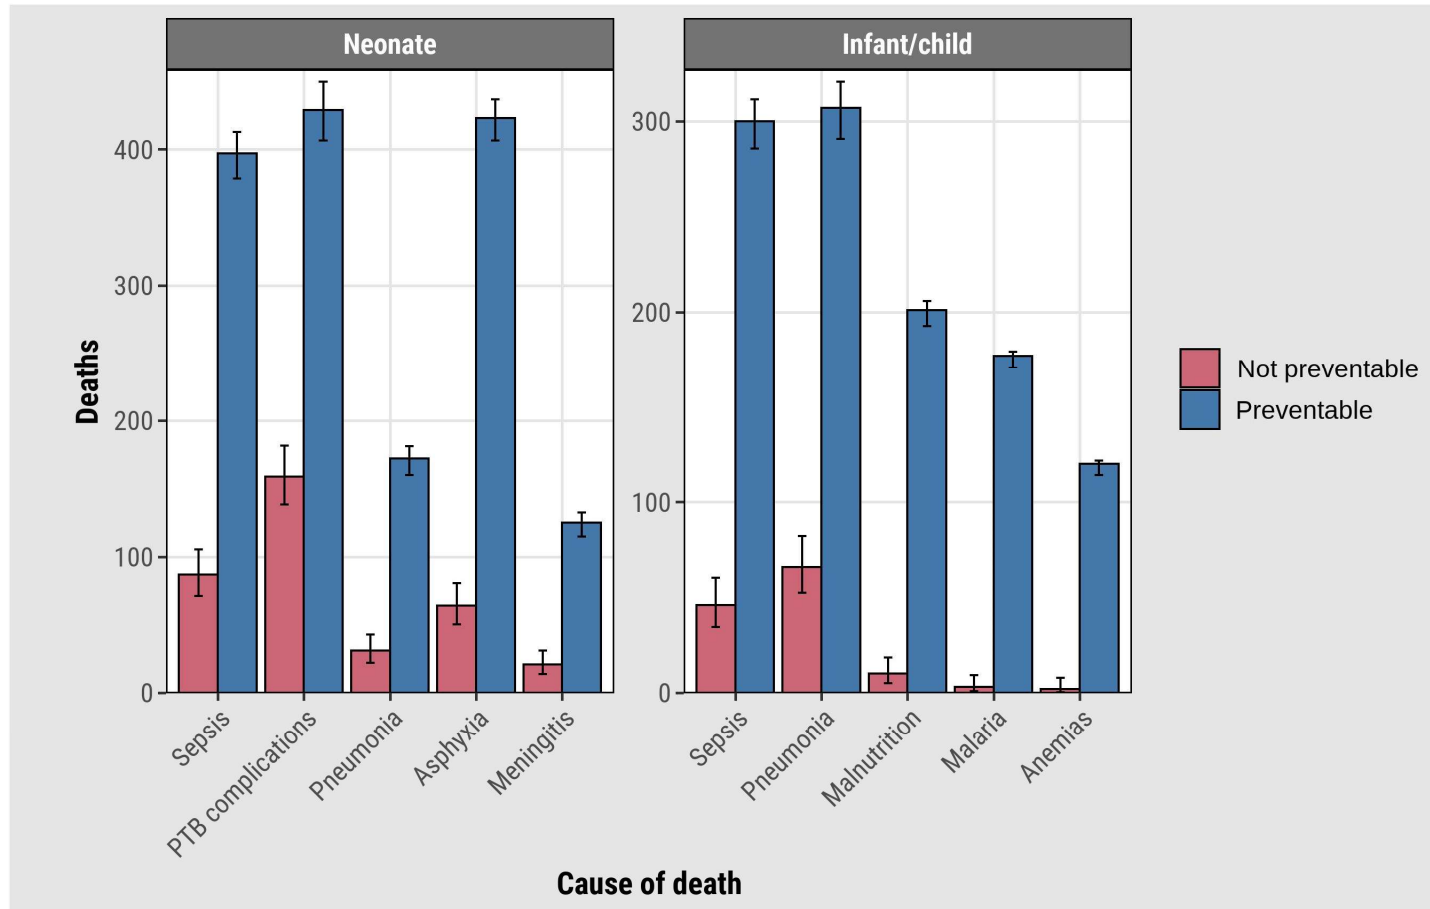

**eFigure 3. Most Frequent Causes of Death Anywhere in the Causal Chain for Which the Optimal Health System Improvement Categories Were Recommended to Prevent Death for Each Age Group, December 2016 to December 2021**

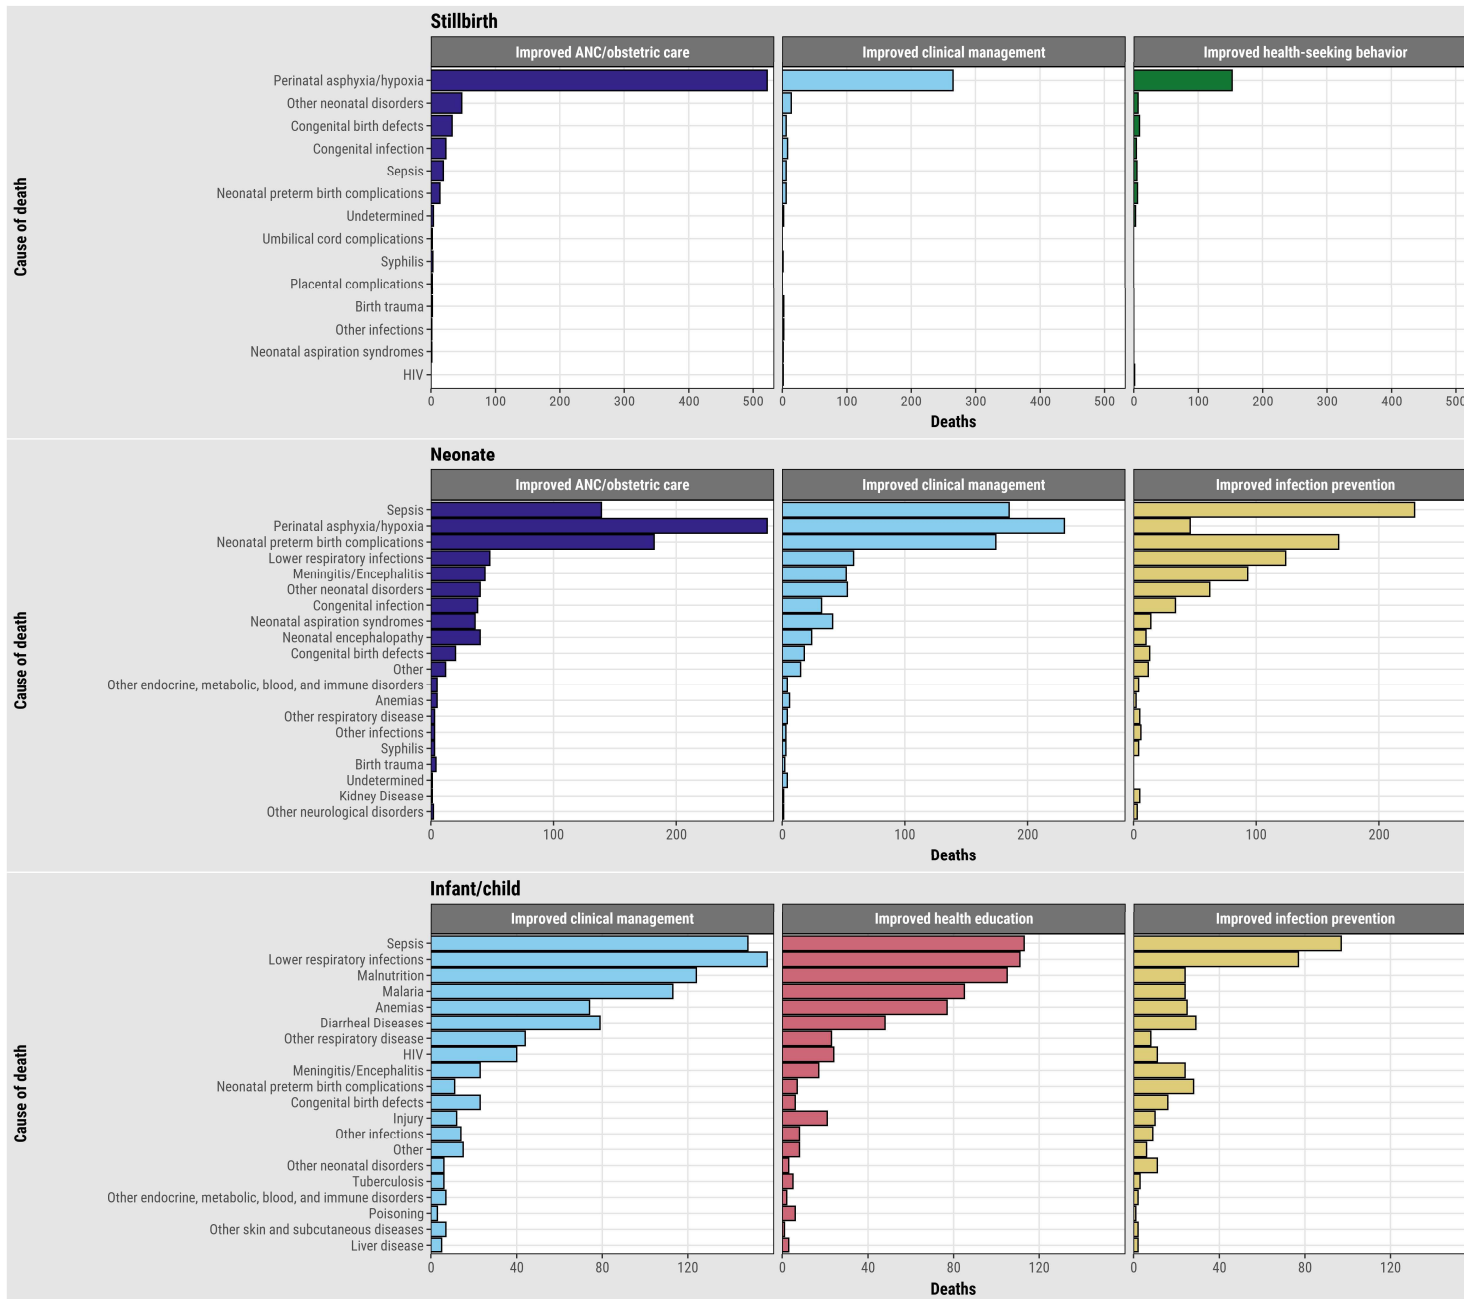

**eFigure 4. Optimal Combinations of Health System Improvement Categories That Could Have Prevented the Most Deaths Across All Sites by Age Group, December 2016 to December 2021**

This figure assumes all recommendations given for a single death are necessary to prevent that death. The stacked bars represent the proportion of additional deaths that could have been prevented with each additional health system improvement category implemented.

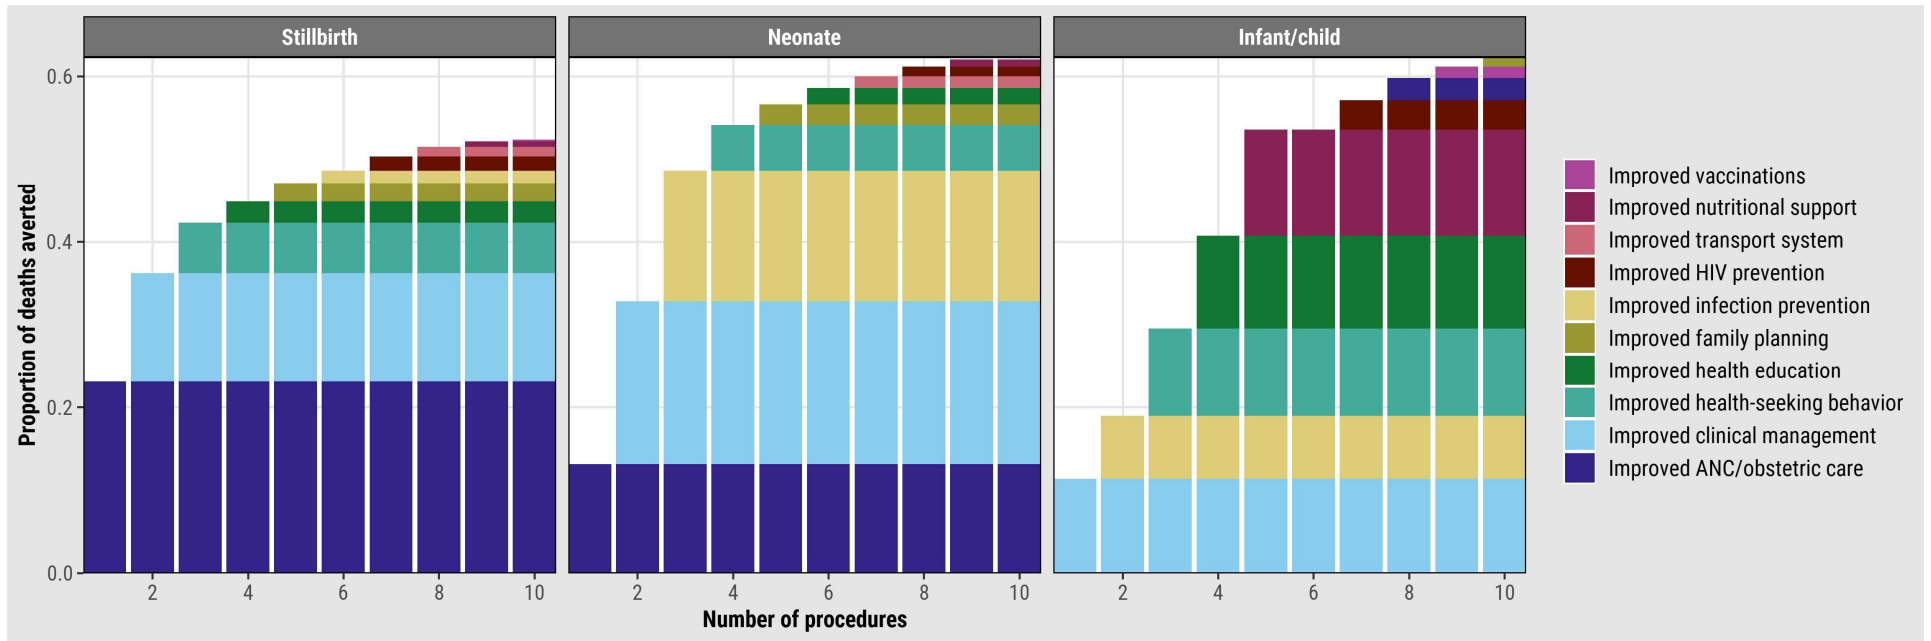

Examining which combinations of 1-10 health system improvement categories could have prevented the most deaths demonstrates that most preventable stillbirths or neonatal deaths could have been prevented with three categories improved and most infant/child deaths could have been prevented with five categories improved under the assumption that all categories given for a single death are necessary to prevent that death.

**eFigure 5. Proportion of the 5 Most Frequent Causes of Death That Could Have Been Prevented for the Optimal Combinations of Health System Improvement Categories That Could Have Prevented the Most Deaths Across All Sites by Age Group, December 2016 to December 2021**

This plot assumes all recommendations given for a single death are necessary to prevent that death.

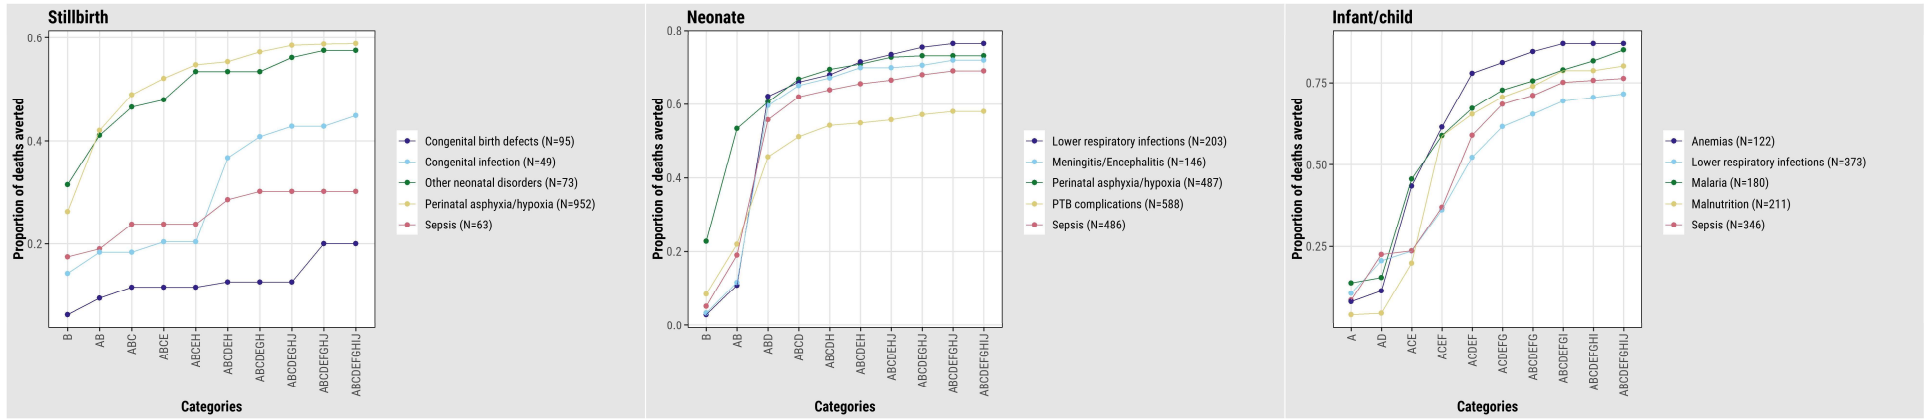

- A: Improved clinical management and quality of care
- B: Improved antenatal and obstetric care and management
- C: Improved health-seeking behavior
- D: Improved infection prevention and control
- E: Improved health education [immunizations, preventing malnutrition, diarrhea, malaria, burns, poisoning, etc.]
- F: Improved nutritional support
- G: Improved HIV prevention and control
- H: Improved family planning
- I: Improved use of existing vaccinations
- J: Improved transport system

**eFigure 6. Alluvial Plot of the Top 20 Most Recommended Interventions Associated With Improved Clinical Management or Improved Antenatal and Obstetric Care Across All Age Groups, December 2016 to December 2021**

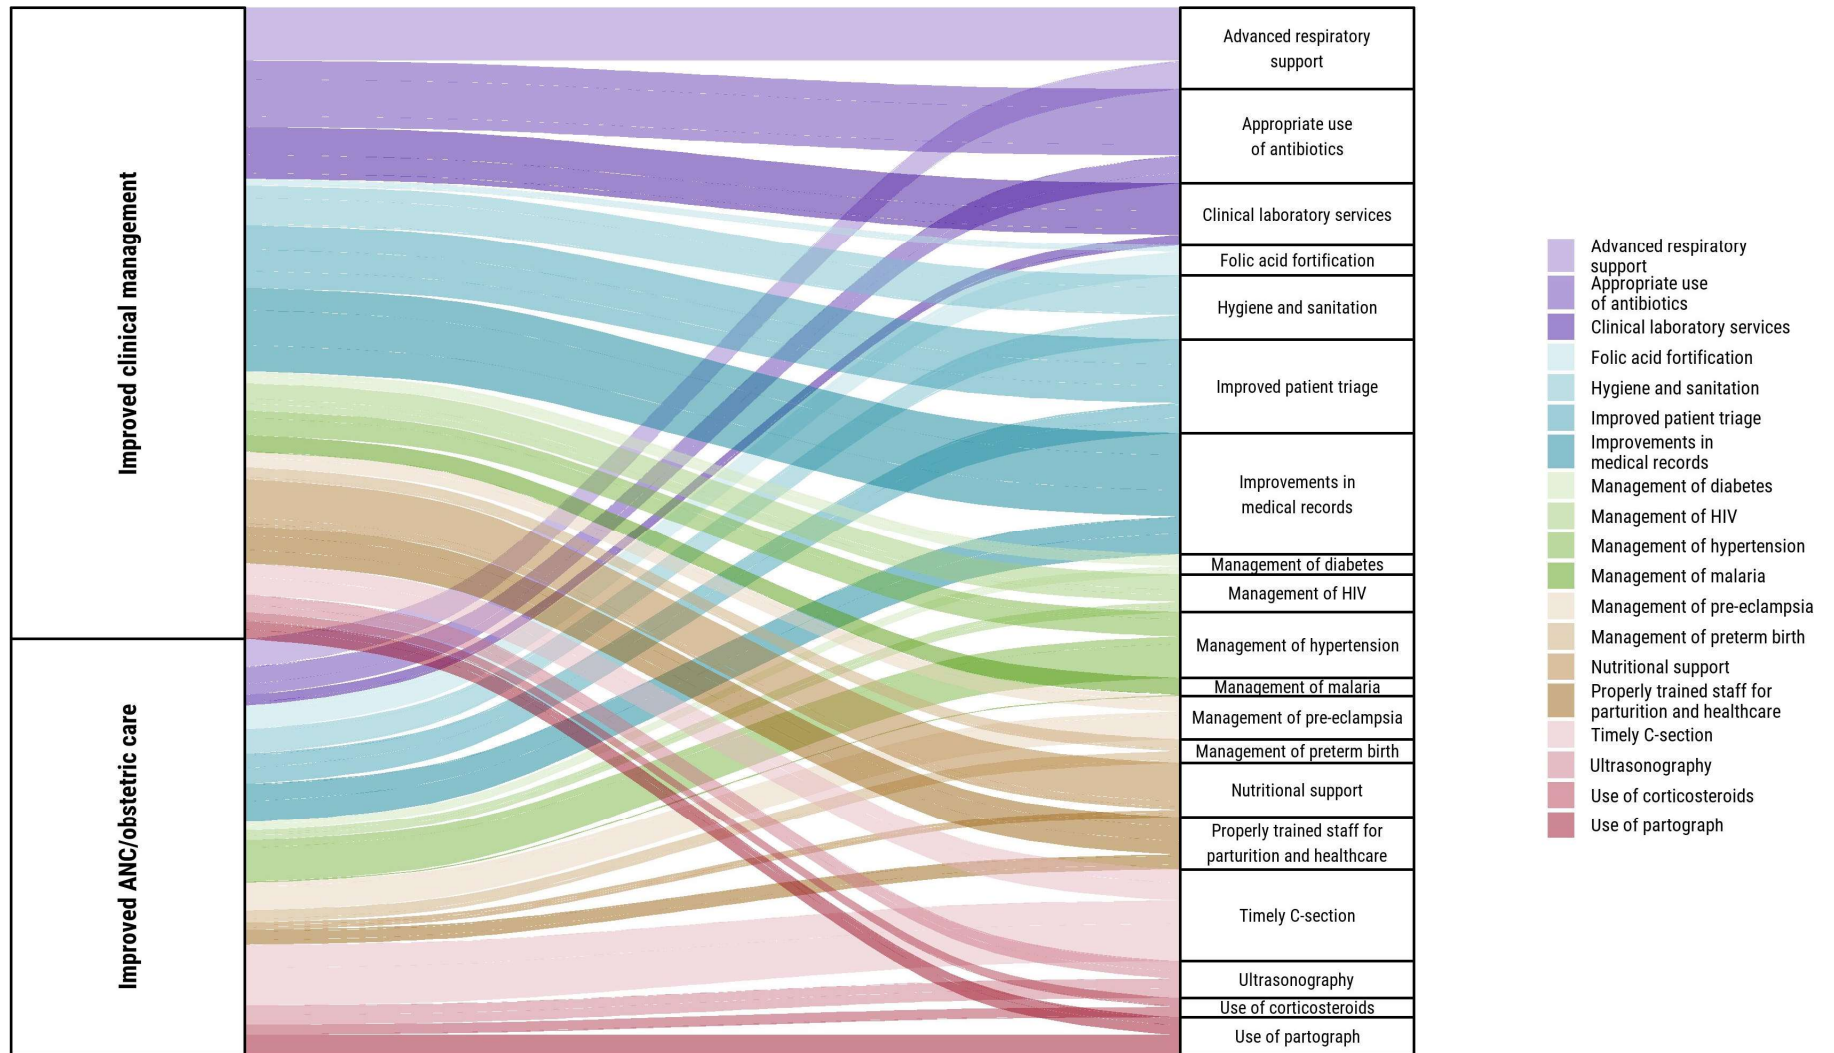



| eTable 1. Characteristics of Deaths Enrolled in CHAMPS, December 2016 to December 2021 |                      |                      |                       |
|----------------------------------------------------------------------------------------|----------------------|----------------------|-----------------------|
|                                                                                        | Stillbirth           | Neonate              | Infant/child          |
|                                                                                        | N=1,190              | N=1,340              | N=860                 |
| Characteristic                                                                         | N (%)                | N (%)                | N (%)                 |
| CHAMPS sites                                                                           |                      |                      |                       |
| Bangladesh                                                                             | 183 (15.4)           | 177 (13.2)           | 4 (0.5)               |
| Ethiopia                                                                               | 207 (17.4)           | 101 (7.5)            | 26 (3.0)              |
| Kenya                                                                                  | 167 (14.0)           | 173 (12.9)           | 238 (27.7)            |
| Mali                                                                                   | 82 (6.9)             | 74 (5.5)             | 52 (6.0)              |
| Mozambique                                                                             | 256 (21.5)           | 255 (19.0)           | 143 (16.6)            |
| Sierra Leone                                                                           | 120 (10.1)           | 124 (9.3)            | 176 (20.5)            |
| South Africa                                                                           | 175 (14.7)           | 436 (32.5)           | 221 (25.7)            |
| Sex                                                                                    |                      |                      |                       |
| Female                                                                                 | 538 (45.2)           | 576 (43.0)           | 391 (45.5)            |
| Male                                                                                   | 650 (54.6)           | 761 (56.8)           | 469 (54.5)            |
| Indeterminate                                                                          | 2 (0.2)              | 3 (0.2)              | 0 (0)                 |
| Median (IQR) weight at MITS, in grams (N=3,369)                                        | 2,200 (1,500, 2,900) | 1,808 (1,100, 2,800) | 6,955 (4,316, 10,000) |
| Weight for height z-score, n (%)                                                       |                      |                      |                       |
| Normal weight for height ( $\geq -2SD$ )                                               | --                   | 297 (22.2)           | 354 (41.2)            |
| Moderate wasting ( $<-2 SD, -3 SD$ )                                                   | --                   | 92 (6.9)             | 120 (14.0)            |
| Severe wasting ( $<-3 SD$ )                                                            | --                   | 234 (17.5)           | 325 (37.8)            |
| Not recorded                                                                           | --                   | 717 (53.5)           | 61 (7.1)              |
| Weight for age z-score, n (%)                                                          |                      |                      |                       |
| Normal weight for age ( $\geq -2SD$ )                                                  | --                   | 462 (34.5)           | 332 (38.6)            |
| Moderate underweight ( $<-2 SD, -3 SD$ )                                               | --                   | 110 (8.2)            | 135 (15.7)            |
| Severe underweight ( $<-3 SD$ )                                                        | --                   | 757 (56.5)           | 382 (44.4)            |
| Not recorded                                                                           | --                   | 11 (0.8)             | 11 (1.3)              |
| Height for age z-score, n (%)                                                          |                      |                      |                       |
| Normal height for age ( $\geq -2SD$ )                                                  | --                   | 516 (38.5)           | 494 (57.4)            |
| Moderate stunting ( $<-2 SD, -3 SD$ )                                                  | --                   | 103 (7.7)            | 123 (14.3)            |
| Severe stunting ( $<-3 SD$ )                                                           | --                   | 714 (53.3)           | 241 (28.0)            |
| Not recorded                                                                           | --                   | 7 (0.5)              | 2 (0.2)               |
| Median (IQR) of hours between death and MITS done (N=3,375)                            | 10 (3, 19)           | 12 (4, 21)           | 14 (6, 21)            |
| Location of death, n (%) (N=3,392)                                                     |                      |                      |                       |
| Community                                                                              | 41 (3.4)             | 68 (5.1)             | 235 (27.3)            |
| Health facility                                                                        | 1,148 (96.6)         | 1,272 (94.9)         | 625 (72.7)            |

| eTable 2. The 10 Most Frequent Causes of Death by Age Group and Site, December 2016 to December 2021 |            |            |            |           |            |              |              |
|------------------------------------------------------------------------------------------------------|------------|------------|------------|-----------|------------|--------------|--------------|
| Cause of death                                                                                       | Bangladesh | Ethiopia   | Kenya      | Mali      | Mozambique | Sierra Leone | South Africa |
|                                                                                                      | N (%)      | N (%)      | N (%)      | N (%)     | N (%)      | N (%)        | N (%)        |
| <i>Stillbirth</i>                                                                                    | N=183      | N=207      | N=167      | N=82      | N=256      | N=120        | N=175        |
| Perinatal asphyxia/hypoxia                                                                           | 169 (92.3) | 143 (69.1) | 156 (93.4) | 70 (85.4) | 207 (80.9) | 107 (89.2)   | 100 (57.1)   |
| Congenital birth defects                                                                             | 10 (5.5)   | 49 (23.7)  | 0 (0)      | 8 (9.8)   | 15 (5.9)   | 6 (5.0)      | 7 (4.0)      |
| Other neonatal disorders                                                                             | 38 (20.8)  | 15 (7.2)   | 2 (1.2)    | 13 (15.9) | 1 (0.4)    | 3 (2.5)      | 1 (0.6)      |
| Sepsis                                                                                               | 2 (1.1)    | 6 (2.9)    | 2 (1.2)    | 3 (3.7)   | 5 (2.0)    | 1 (0.8)      | 44 (25.1)    |
| Congenital infection                                                                                 | 7 (3.8)    | 0 (0)      | 3 (1.8)    | 0 (0)     | 23 (9.0)   | 2 (1.7)      | 14 (8.0)     |
| Neonatal preterm birth complications                                                                 | 11 (6.0)   | 1 (0.5)    | 0 (0)      | 0 (0)     | 2 (0.8)    | 10 (8.3)     | 0 (0)        |
| Syphilis                                                                                             | 0 (0)      | 0 (0)      | 0 (0)      | 0 (0)     | 3 (1.2)    | 0 (0)        | 3 (1.7)      |
| Other infections                                                                                     | 3 (1.6)    | 0 (0)      | 0 (0)      | 0 (0)     | 0 (0)      | 0 (0)        | 1 (0.6)      |
| Neonatal aspiration syndromes                                                                        | 2 (1.1)    | 0 (0)      | 1 (0.6)    | 0 (0)     | 0 (0)      | 0 (0)        | 0 (0)        |
| Placental complications                                                                              | 0 (0)      | 0 (0)      | 0 (0)      | 2 (2.4)   | 0 (0)      | 0 (0)        | 1 (0.6)      |
| <i>Neonate</i>                                                                                       | N=177      | N=10       | N=173      | N=74      | N=255      | N=124        | N=436        |
| Neonatal preterm birth complications                                                                 | 105 (59.3) | 42 (41.6)  | 45 (26.0)  | 25 (33.8) | 63 (24.7)  | 33 (26.6)    | 275 (63.1)   |
| Perinatal asphyxia/hypoxia                                                                           | 109 (61.6) | 38 (37.6)  | 61 (35.3)  | 16 (21.6) | 106 (41.6) | 76 (61.3)    | 81 (18.6)    |
| Sepsis                                                                                               | 46 (26.0)  | 63 (62.4)  | 37 (21.4)  | 27 (36.5) | 53 (20.8)  | 40 (32.3)    | 218 (50.0)   |
| Lower respiratory infections                                                                         | 2 (1.1)    | 29 (28.7)  | 10 (5.8)   | 15 (20.3) | 16 (6.3)   | 10 (8.1)     | 121 (27.8)   |
| Other neonatal disorders                                                                             | 26 (14.7)  | 19 (18.8)  | 6 (3.5)    | 7 (9.5)   | 5 (2.0)    | 2 (1.6)      | 99 (22.7)    |
| Meningitis/Encephalitis                                                                              | 4 (2.3)    | 33 (32.7)  | 2 (1.2)    | 4 (5.4)   | 4 (1.6)    | 12 (9.7)     | 87 (20.0)    |
| Congenital birth defects                                                                             | 12 (6.8)   | 10 (9.9)   | 6 (3.5)    | 20 (27.0) | 18 (7.1)   | 7 (5.6)      | 56 (12.8)    |
| Congenital infection                                                                                 | 6 (3.4)    | 10 (9.9)   | 3 (1.7)    | 2 (2.7)   | 22 (8.6)   | 13 (10.5)    | 47 (10.8)    |
| Neonatal encephalopathy                                                                              | 18 (10.2)  | 2 (2.0)    | 2 (1.2)    | 7 (9.5)   | 10 (3.9)   | 1 (0.8)      | 37 (8.5)     |
| Neonatal aspiration syndromes                                                                        | 4 (2.3)    | 22 (21.8)  | 14 (8.1)   | 3 (4.1)   | 7 (2.7)    | 8 (6.5)      | 13 (3.0)     |
| <i>Infant/child</i>                                                                                  | N=4        | N=26       | N=238      | N=52      | N=143      | N=176        | N=221        |
| Lower respiratory infections                                                                         | 1 (25.0)   | 20 (76.9)  | 69 (29.0)  | 26 (50.0) | 70 (49.0)  | 60 (34.1)    | 127 (57.5)   |
| Sepsis                                                                                               | 3 (75.0)   | 21 (80.8)  | 68 (28.6)  | 30 (57.7) | 45 (31.5)  | 70 (39.8)    | 109 (49.3)   |
| Malnutrition                                                                                         | 1 (25.0)   | 18 (69.2)  | 76 (31.9)  | 14 (26.9) | 12 (8.4)   | 77 (43.8)    | 13 (5.9)     |
| Malaria                                                                                              | 0 (0)      | 1 (3.8)    | 78 (32.8)  | 3 (5.8)   | 24 (16.8)  | 74 (42.0)    | 0 (0)        |
| Anemias                                                                                              | 1 (25.0)   | 2 (7.7)    | 4 (1.7)    | 1 (1.9)   | 9 (6.3)    | 105 (59.7)   | 0 (0)        |
| Diarrheal Diseases                                                                                   | 1 (25.0)   | 8 (30.8)   | 29 (12.2)  | 9 (17.3)  | 34 (23.8)  | 21 (11.9)    | 19 (8.6)     |
| HIV                                                                                                  | 0 (0)      | 0 (0)      | 30 (12.6)  | 4 (7.7)   | 26 (18.2)  | 8 (4.5)      | 23 (10.4)    |
| Congenital birth defects                                                                             | 1 (25.0)   | 0 (0)      | 16 (6.7)   | 6 (11.5)  | 11 (7.7)   | 0 (0)        | 45 (20.4)    |
| Other respiratory disease                                                                            | 0 (0)      | 2 (7.7)    | 25 (10.5)  | 3 (5.8)   | 13 (9.1)   | 14 (8.0)     | 20 (9.0)     |
| Meningitis/Encephalitis                                                                              | 0 (0)      | 11 (42.3)  | 2 (0.8)    | 6 (11.5)  | 2 (1.4)    | 9 (5.1)      | 38 (17.2)    |

eTable 3. Proportion of Deaths That Were Deemed Preventable by Age Group and Site, December 2016 to December 2021

|              | <b>Stillbirth<br/>(N=1,190)</b> | <b>Neonate<br/>(N=1,340)</b> | <b>Infant/child<br/>(N=860)</b> |
|--------------|---------------------------------|------------------------------|---------------------------------|
| Site         | <b>N (%)</b>                    | <b>N (%)</b>                 | <b>N (%)</b>                    |
| Bangladesh   | 172 (94.0)                      | 169 (95.5)                   | 3 (75.0)                        |
| Ethiopia     | 196 (94.7)                      | 98 (97.0)                    | 26 (100.0)                      |
| Kenya        | 161 (96.4)                      | 164 (94.8)                   | 229 (96.2)                      |
| Mali         | 58 (70.7)                       | 54 (73.0)                    | 40 (76.9)                       |
| Mozambique   | 151 (59.0)                      | 168 (65.9)                   | 112 (78.3)                      |
| Sierra Leone | 108 (90.0)                      | 116 (93.5)                   | 169 (96.0)                      |
| South Africa | 37 (21.1)                       | 241 (55.3)                   | 135 (61.1)                      |

**eTable 4. Specific Public Health Actions Recommended by the Expert Determination of Cause of Death Panel to Prevent Deaths by Age Group**

|                                                       | <b>Stillbirth<br/>(N=633)</b> | <b>Neonate<br/>(N=725)</b> | <b>Infant/child<br/>(N=529)</b> |
|-------------------------------------------------------|-------------------------------|----------------------------|---------------------------------|
| Public health action                                  | <b>N (%)</b>                  | <b>N (%)</b>               | <b>N (%)</b>                    |
| Hygiene and sanitation                                | 5 (0.8)                       | 169 (23.3)                 | 73 (13.8)                       |
| Improvements in medical records                       | 75 (11.8)                     | 73 (10.1)                  | 45 (8.5)                        |
| Improved patient triage                               | 51 (8.1)                      | 52 (7.2)                   | 49 (9.3)                        |
| Appropriate use of antibiotics                        | 34 (5.4)                      | 71 (9.8)                   | 35 (6.6)                        |
| Nutritional support                                   | 13 (2.1)                      | 12 (1.7)                   | 110 (20.8)                      |
| Timely C-section                                      | 79 (12.5)                     | 54 (7.4)                   | 1 (0.2)                         |
| Advanced respiratory support                          | 1 (0.2)                       | 84 (11.6)                  | 21 (4.0)                        |
| Management of HIV                                     | 17 (2.7)                      | 14 (1.9)                   | 74 (14.0)                       |
| Clinical laboratory services                          | 14 (2.2)                      | 34 (4.7)                   | 52 (9.8)                        |
| Management of hypertension                            | 79 (12.5)                     | 19 (2.6)                   | 0 (0.0)                         |
| Properly trained staff for parturition and healthcare | 28 (4.4)                      | 35 (4.8)                   | 19 (3.6)                        |
| Folic acid fortification                              | 55 (8.7)                      | 12 (1.7)                   | 3 (0.6)                         |
| Management of pre-eclampsia                           | 45 (7.1)                      | 12 (1.7)                   | 0 (0.0)                         |
| Ultrasonography                                       | 25 (3.9)                      | 30 (4.1)                   | 2 (0.4)                         |
| Use of partograph                                     | 30 (4.7)                      | 20 (2.8)                   | 3 (0.6)                         |
| Management of malaria                                 | 2 (0.3)                       | 0 (0.0)                    | 31 (5.9)                        |
| Childhood vaccinations                                | 0 (0.0)                       | 2 (0.3)                    | 30 (5.7)                        |
| Management of diabetes                                | 17 (2.7)                      | 11 (1.5)                   | 3 (0.6)                         |
| Appropriate use of corticosteroids                    | 4 (0.6)                       | 21 (2.9)                   | 1 (0.2)                         |
| Management of preterm birth                           | 6 (0.9)                       | 20 (2.8)                   | 0 (0.0)                         |
| Availability of 24/7 healthcare services              | 8 (1.3)                       | 7 (1.0)                    | 10 (1.9)                        |
| Management of diarrheal diseases and rehydration      | 0 (0.0)                       | 4 (0.6)                    | 20 (3.8)                        |
| Radiography                                           | 5 (0.8)                       | 8 (1.1)                    | 9 (1.7)                         |
| Proper care of twin pregnancy                         | 9 (1.4)                       | 10 (1.4)                   | 1 (0.2)                         |
| Fetal heart rate monitoring                           | 12 (1.9)                      | 5 (0.7)                    | 2 (0.4)                         |
| Premature discharge                                   | 2 (0.3)                       | 12 (1.7)                   | 5 (0.9)                         |
| Proper management of maternal anemia during pregnancy | 9 (1.4)                       | 7 (1.0)                    | 3 (0.6)                         |
| Sickle cell screening                                 | 4 (0.6)                       | 3 (0.4)                    | 12 (2.3)                        |
| Blood transfusion therapy                             | 2 (0.3)                       | 3 (0.4)                    | 11 (2.1)                        |
| Management of burns                                   | 0 (0.0)                       | 0 (0.0)                    | 15 (2.8)                        |
| Prevention of hypothermia                             | 0 (0.0)                       | 12 (1.7)                   | 2 (0.4)                         |
| Management of pneumonia                               | 0 (0.0)                       | 2 (0.3)                    | 11 (2.1)                        |
| Group B streptococcus screening                       | 5 (0.8)                       | 6 (0.8)                    | 0 (0.0)                         |
| Syphilis screening and treatment                      | 6 (0.9)                       | 4 (0.6)                    | 1 (0.2)                         |
| Management of maternal trauma                         | 6 (0.9)                       | 3 (0.4)                    | 1 (0.2)                         |
| Adherence to IMCI guidelines                          | 0 (0.0)                       | 1 (0.1)                    | 8 (1.5)                         |
| Availability of medical equipment and supplies        | 1 (0.2)                       | 7 (1.0)                    | 1 (0.2)                         |
| Corrective surgical intervention                      | 3 (0.5)                       | 2 (0.3)                    | 4 (0.8)                         |

|                                                                                                                                                                                                                                                              |         |         |         |
|--------------------------------------------------------------------------------------------------------------------------------------------------------------------------------------------------------------------------------------------------------------|---------|---------|---------|
| Management of anemia                                                                                                                                                                                                                                         | 6 (0.9) | 0 (0.0) | 3 (0.6) |
| Proper Apgar scoring                                                                                                                                                                                                                                         | 1 (0.2) | 8 (1.1) | 0 (0.0) |
| TORCH <sup>b</sup> screening                                                                                                                                                                                                                                 | 2 (0.3) | 2 (0.3) | 3 (0.6) |
| Proper administration of Oxytocin                                                                                                                                                                                                                            | 3 (0.5) | 3 (0.4) | 0 (0.0) |
| Appropriate use of misoprostol                                                                                                                                                                                                                               | 4 (0.6) | 1 (0.1) | 0 (0.0) |
| Management of shock                                                                                                                                                                                                                                          | 0 (0.0) | 1 (0.1) | 4 (0.8) |
| Antifungals                                                                                                                                                                                                                                                  | 0 (0.0) | 0 (0.0) | 2 (0.4) |
| Availability of dermatologist                                                                                                                                                                                                                                | 0 (0.0) | 0 (0.0) | 2 (0.4) |
| Management of congenital heart disease                                                                                                                                                                                                                       | 0 (0.0) | 1 (0.1) | 1 (0.2) |
| Management of heart disease                                                                                                                                                                                                                                  | 0 (0.0) | 2 (0.3) | 0 (0.0) |
| Management of pertussis                                                                                                                                                                                                                                      | 0 (0.0) | 0 (0.0) | 2 (0.4) |
| More ICU beds                                                                                                                                                                                                                                                | 0 (0.0) | 0 (0.0) | 2 (0.4) |
| Pelvic measurement                                                                                                                                                                                                                                           | 2 (0.3) | 0 (0.0) | 0 (0.0) |
| Screening for cancer                                                                                                                                                                                                                                         | 0 (0.0) | 0 (0.0) | 2 (0.4) |
| Screening for tuberculosis                                                                                                                                                                                                                                   | 0 (0.0) | 0 (0.0) | 2 (0.4) |
| Availability of amniocentesis                                                                                                                                                                                                                                | 0 (0.0) | 1 (0.1) | 0 (0.0) |
| Availability of chemotherapy drugs                                                                                                                                                                                                                           | 0 (0.0) | 0 (0.0) | 1 (0.2) |
| Dental services                                                                                                                                                                                                                                              | 0 (0.0) | 0 (0.0) | 1 (0.2) |
| Management of Down syndrome                                                                                                                                                                                                                                  | 0 (0.0) | 0 (0.0) | 1 (0.2) |
| Rho(D) immune globulin                                                                                                                                                                                                                                       | 0 (0.0) | 1 (0.1) | 0 (0.0) |
| Screening for autoimmune diseases                                                                                                                                                                                                                            | 1 (0.2) | 0 (0.0) | 0 (0.0) |
| Screening for jaundice                                                                                                                                                                                                                                       | 0 (0.0) | 1 (0.1) | 0 (0.0) |
| Treatment with Anti-D immunoglobulin                                                                                                                                                                                                                         | 1 (0.2) | 0 (0.0) | 0 (0.0) |
| <sup>a</sup> Public health actions were originally intended to be used as a catch-all and not tied to any single health system improvement category, so there may be some overlap between specific public health actions (e.g., see eFigure 10 for example). |         |         |         |
| <sup>b</sup> TORCH: group of blood tests for toxoplasmosis, rubella cytomegalovirus, herpes simplex, and HIV.                                                                                                                                                |         |         |         |

eTable 5. Number and Proportion of Deaths of Any Cause That Could Have Been Prevented for Each Single Health System Improvement Category Assuming (A1) All Recommendations Given for a Single Death Are Necessary to Prevent That Death, (A2) Deaths Would be Reduced Proportionally for Every Category Implemented, and (A3) Any Single Category Among All Categories Recommended for Each Death Is Sufficient to Prevent that Death, by Site and Age Group, December 2016 to December 2021

| Site         | Assumption | Improved ANC/obstetric care | Improved clinical management | Improved family planning | Improved health-seeking behavior | Improved health education | Improved HIV prevention | Improved infection prevention | Improved nutritional support | Improved transport system | Improved vaccinations |
|--------------|------------|-----------------------------|------------------------------|--------------------------|----------------------------------|---------------------------|-------------------------|-------------------------------|------------------------------|---------------------------|-----------------------|
|              |            | N (%)                       | N (%)                        | N (%)                    | N (%)                            | N (%)                     | N (%)                   | N (%)                         | N (%)                        | N (%)                     | N (%)                 |
| Stillbirth   |            |                             |                              |                          |                                  |                           |                         |                               |                              |                           |                       |
| Bangladesh   | A1         | 68 (37.2)                   | 9 (4.9)                      | 1 (0.5)                  | 3 (1.6)                          | 0 (0)                     | 0 (0)                   | 1 (0.5)                       | 0 (0)                        | 0 (0)                     | 0 (0)                 |
| Bangladesh   | A2         | 96 (52.2)                   | 18 (10.1)                    | 3 (1.5)                  | 9 (4.8)                          | 0 (0.0)                   | 0 (0.0)                 | 2 (1.3)                       | 1 (0.5)                      | 0 (0.0)                   | 0 (0.3)               |
| Bangladesh   | A3         | 127 (69.4)                  | 30 (16.4)                    | 5 (2.7)                  | 16 (8.7)                         | 0 (0.0)                   | 0 (0.0)                 | 4 (2.2)                       | 2 (1.1)                      | 0 (0.0)                   | 1 (0.5)               |
| Ethiopia     | A1         | 9 (4.3)                     | 0 (0)                        | 0 (0)                    | 0 (0)                            | 0 (0)                     | 0 (0)                   | 0 (0)                         | 1 (0.5)                      | 0 (0)                     | 0 (0)                 |
| Ethiopia     | A2         | 50 (24.3)                   | 16 (7.6)                     | 10 (4.7)                 | 26 (12.6)                        | 10 (4.9)                  | 0 (0.2)                 | 1 (0.3)                       | 12 (5.6)                     | 2 (1.0)                   | 0 (0.0)               |
| Ethiopia     | A3         | 130 (62.8)                  | 48 (23.2)                    | 35 (16.9)                | 78 (37.7)                        | 36 (17.4)                 | 1 (0.5)                 | 2 (1.0)                       | 38 (18.4)                    | 8 (3.9)                   | 0 (0.0)               |
| Kenya        | A1         | 18 (10.8)                   | 30 (18.0)                    | 1 (0.6)                  | 7 (4.2)                          | 4 (2.4)                   | 0 (0)                   | 0 (0)                         | 0 (0)                        | 1 (0.6)                   | 0 (0)                 |
| Kenya        | A2         | 41 (24.5)                   | 55 (33.2)                    | 4 (2.6)                  | 22 (13.0)                        | 10 (6.2)                  | 5 (3.2)                 | 0 (0.1)                       | 0 (0.0)                      | 2 (0.9)                   | 0 (0.0)               |
| Kenya        | A3         | 75 (44.9)                   | 93 (55.7)                    | 10 (6.0)                 | 46 (27.5)                        | 22 (13.2)                 | 16 (9.6)                | 1 (0.6)                       | 0 (0.0)                      | 3 (1.8)                   | 0 (0.0)               |
| Mali         | A1         | 36 (43.9)                   | 6 (7.3)                      | 0 (0)                    | 0 (0)                            | 1 (1.2)                   | 0 (0)                   | 0 (0)                         | 0 (0)                        | 1 (1.2)                   | 0 (0)                 |
| Mali         | A2         | 38 (46.3)                   | 8 (9.8)                      | 0 (0.0)                  | 0 (0.0)                          | 2 (1.8)                   | 0 (0.0)                 | 0 (0.0)                       | 0 (0.0)                      | 2 (1.8)                   | 0 (0.0)               |
| Mali         | A3         | 40 (48.8)                   | 10 (12.2)                    | 0 (0.0)                  | 0 (0.0)                          | 2 (2.4)                   | 0 (0.0)                 | 0 (0.0)                       | 0 (0.0)                      | 2 (2.4)                   | 0 (0.0)               |
| Mozambique   | A1         | 110 (43.0)                  | 4 (1.6)                      | 0 (0)                    | 0 (0)                            | 0 (0)                     | 0 (0)                   | 2 (0.8)                       | 0 (0)                        | 0 (0)                     | 0 (0)                 |
| Mozambique   | A2         | 122 (47.7)                  | 14 (5.3)                     | 0 (0.1)                  | 2 (0.7)                          | 1 (0.4)                   | 0 (0.1)                 | 7 (2.6)                       | 0 (0.0)                      | 2 (0.8)                   | 0 (0.1)               |
| Mozambique   | A3         | 142 (55.5)                  | 30 (11.7)                    | 1 (0.4)                  | 7 (2.7)                          | 5 (2.0)                   | 1 (0.4)                 | 16 (6.2)                      | 0 (0.0)                      | 7 (2.7)                   | 2 (0.8)               |
| Sierra Leone | A1         | 11 (9.2)                    | 16 (13.3)                    | 0 (0)                    | 10 (8.3)                         | 0 (0)                     | 1 (0.8)                 | 0 (0)                         | 0 (0)                        | 0 (0)                     | 0 (0)                 |
| Sierra Leone | A2         | 28 (23.3)                   | 38 (31.4)                    | 0 (0.1)                  | 15 (12.8)                        | 2 (2.1)                   | 2 (1.4)                 | 1 (0.6)                       | 0 (0.4)                      | 0 (0.0)                   | 0 (0.0)               |
| Sierra Leone | A3         | 47 (39.2)                   | 61 (50.8)                    | 1 (0.8)                  | 21 (17.5)                        | 7 (5.8)                   | 3 (2.5)                 | 2 (1.7)                       | 1 (0.8)                      | 0 (0.0)                   | 0 (0.0)               |
| South Africa | A1         | 23 (13.1)                   | 5 (2.9)                      | 0 (0)                    | 0 (0)                            | 0 (0)                     | 2 (1.1)                 | 1 (0.6)                       | 0 (0)                        | 0 (0)                     | 0 (0)                 |
| South Africa | A2         | 25 (14.3)                   | 6 (3.7)                      | 0 (0.3)                  | 0 (0.3)                          | 0 (0.0)                   | 2 (1.1)                 | 1 (0.6)                       | 0 (0.0)                      | 0 (0.0)                   | 0 (0.0)               |
| South Africa | A3         | 27 (15.4)                   | 8 (4.6)                      | 1 (0.6)                  | 1 (0.6)                          | 0 (0.0)                   | 2 (1.1)                 | 1 (0.6)                       | 0 (0.0)                      | 0 (0.0)                   | 0 (0.0)               |
| Neonate      |            |                             |                              |                          |                                  |                           |                         |                               |                              |                           |                       |
| Bangladesh   | A1         | 34 (19.2)                   | 32 (18.1)                    | 1 (0.6)                  | 1 (0.6)                          | 0 (0)                     | 0 (0)                   | 2 (1.1)                       | 0 (0)                        | 0 (0)                     | 0 (0)                 |
| Bangladesh   | A2         | 67 (37.9)                   | 60 (33.9)                    | 2 (1.3)                  | 10 (5.7)                         | 0 (0.0)                   | 0 (0.0)                 | 8 (4.6)                       | 1 (0.3)                      | 0 (0.0)                   | 0 (0.0)               |
| Bangladesh   | A3         | 107 (60.5)                  | 96 (54.2)                    | 4 (2.3)                  | 23 (13.0)                        | 0 (0.0)                   | 0 (0.0)                 | 18 (10.2)                     | 2 (1.1)                      | 0 (0.0)                   | 0 (0.0)               |
| Ethiopia     | A1         | 1 (1.0)                     | 1 (1.0)                      | 0 (0)                    | 0 (0)                            | 0 (0)                     | 0 (0)                   | 0 (0)                         | 0 (0)                        | 0 (0)                     | 0 (0)                 |
| Ethiopia     | A2         | 24 (24.2)                   | 28 (27.8)                    | 3 (3.0)                  | 11 (10.8)                        | 2 (2.2)                   | 1 (0.5)                 | 12 (11.8)                     | 1 (0.5)                      | 2 (2.3)                   | 0 (0.0)               |
| Ethiopia     | A3         | 77 (76.2)                   | 86 (85.1)                    | 12 (11.9)                | 39 (38.6)                        | 8 (7.9)                   | 2 (2.0)                 | 44 (43.6)                     | 2 (2.0)                      | 9 (8.9)                   | 0 (0.0)               |
| Kenya        | A1         | 7 (4.0)                     | 42 (24.3)                    | 2 (1.2)                  | 3 (1.7)                          | 0 (0)                     | 0 (0)                   | 1 (0.6)                       | 0 (0)                        | 3 (1.7)                   | 0 (0)                 |
| Kenya        | A2         | 25 (14.5)                   | 72 (41.4)                    | 6 (3.3)                  | 20 (11.7)                        | 8 (4.8)                   | 3 (1.6)                 | 4 (2.6)                       | 1 (0.6)                      | 4 (2.3)                   | 0 (0.0)               |
| Kenya        | A3         | 55 (31.8)                   | 118 (68.2)                   | 13 (7.5)                 | 53 (30.6)                        | 23 (13.3)                 | 7 (4.0)                 | 10 (5.8)                      | 3 (1.7)                      | 6 (3.5)                   | 0 (0.0)               |
| Mali         | A1         | 13 (17.6)                   | 17 (23.0)                    | 0 (0)                    | 0 (0)                            | 1 (1.4)                   | 0 (0)                   | 1 (1.4)                       | 0 (0)                        | 1 (1.4)                   | 0 (0)                 |
| Mali         | A2         | 16 (20.9)                   | 19 (25.7)                    | 0 (0.0)                  | 0 (0.0)                          | 1 (1.4)                   | 0 (0.0)                 | 3 (4.1)                       | 0 (0.0)                      | 2 (2.0)                   | 0 (0.0)               |

|              |    |            |            |          |            |            |           |            |           |         |           |
|--------------|----|------------|------------|----------|------------|------------|-----------|------------|-----------|---------|-----------|
| Mali         | A3 | 18 (24.3)  | 21 (28.4)  | 0 (0.0)  | 0 (0.0)    | 1 (1.4)    | 0 (0.0)   | 5 (6.8)    | 0 (0.0)   | 2 (2.7) | 0 (0.0)   |
| Mozambique   | A1 | 78 (30.6)  | 21 (8.2)   | 0 (0)    | 0 (0)      | 0 (0)      | 0 (0)     | 2 (0.8)    | 0 (0)     | 0 (0)   | 0 (0)     |
| Mozambique   | A2 | 100 (39.3) | 45 (17.7)  | 2 (0.7)  | 2 (0.9)    | 2 (0.6)    | 1 (0.6)   | 11 (4.5)   | 0 (0.2)   | 2 (0.6) | 0 (0.0)   |
| Mozambique   | A3 | 133 (52.2) | 81 (31.8)  | 4 (1.6)  | 8 (3.1)    | 7 (2.7)    | 7 (2.7)   | 31 (12.2)  | 2 (0.8)   | 5 (2.0) | 0 (0.0)   |
| Sierra Leone | A1 | 6 (4.8)    | 23 (18.5)  | 0 (0)    | 6 (4.8)    | 0 (0)      | 0 (0)     | 3 (2.4)    | 0 (0)     | 0 (0)   | 0 (0)     |
| Sierra Leone | A2 | 25 (20.4)  | 44 (35.9)  | 0 (0.0)  | 8 (6.7)    | 1 (1.1)    | 0 (0.0)   | 6 (5.1)    | 0 (0.3)   | 0 (0.3) | 0 (0.0)   |
| Sierra Leone | A3 | 47 (37.9)  | 69 (55.6)  | 0 (0.0)  | 12 (9.7)   | 4 (3.2)    | 0 (0.0)   | 11 (8.9)   | 1 (0.8)   | 1 (0.8) | 0 (0.0)   |
| South Africa | A1 | 38 (8.7)   | 15 (3.4)   | 3 (0.7)  | 1 (0.2)    | 0 (0)      | 1 (0.2)   | 141 (32.3) | 1 (0.2)   | 0 (0)   | 0 (0)     |
| South Africa | A2 | 48 (11.1)  | 21 (4.7)   | 5 (1.2)  | 2 (0.4)    | 0 (0.1)    | 2 (0.4)   | 147 (33.7) | 4 (0.8)   | 0 (0.0) | 0 (0.0)   |
| South Africa | A3 | 59 (13.5)  | 27 (6.2)   | 8 (1.8)  | 3 (0.7)    | 1 (0.2)    | 3 (0.7)   | 153 (35.1) | 6 (1.4)   | 0 (0.0) | 0 (0.0)   |
| Infant/child |    |            |            |          |            |            |           |            |           |         |           |
| Bangladesh   | A1 | 0 (0)      | 0 (0)      | 0 (0)    | 1 (25.0)   | 0 (0)      | 0 (0)     | 0 (0)      | 0 (0)     | 0 (0)   | 0 (0)     |
| Bangladesh   | A2 | 0 (0.0)    | 0 (0.0)    | 0 (0.0)  | 2 (37.5)   | 0 (12.5)   | 0 (0.0)   | 0 (0.0)    | 0 (0.0)   | 0 (0.0) | 0 (0.0)   |
| Bangladesh   | A3 | 0 (0.0)    | 0 (0.0)    | 0 (0.0)  | 2 (50.0)   | 1 (25.0)   | 0 (0.0)   | 0 (0.0)    | 0 (0.0)   | 0 (0.0) | 0 (0.0)   |
| Ethiopia     | A2 | 1 (3.8)    | 4 (16.1)   | 0 (0.0)  | 7 (25.2)   | 5 (20.4)   | 0 (0.0)   | 2 (6.1)    | 4 (15.9)  | 0 (0.6) | 2 (9.2)   |
| Ethiopia     | A3 | 3 (11.5)   | 18 (69.2)  | 0 (0.0)  | 25 (96.2)  | 22 (84.6)  | 0 (0.0)   | 8 (30.8)   | 18 (69.2) | 1 (3.8) | 10 (38.5) |
| Kenya        | A1 | 1 (0.4)    | 32 (13.4)  | 0 (0)    | 8 (3.4)    | 2 (0.8)    | 2 (0.8)   | 0 (0)      | 3 (1.3)   | 0 (0)   | 0 (0)     |
| Kenya        | A2 | 6 (2.4)    | 84 (35.2)  | 4 (1.5)  | 48 (20.0)  | 22 (9.3)   | 8 (3.3)   | 3 (1.4)    | 27 (11.2) | 1 (0.4) | 2 (1.0)   |
| Kenya        | A3 | 18 (7.6)   | 169 (71.0) | 12 (5.0) | 118 (49.6) | 62 (26.1)  | 22 (9.2)  | 11 (4.6)   | 73 (30.7) | 4 (1.7) | 9 (3.8)   |
| Mali         | A1 | 0 (0)      | 4 (7.7)    | 0 (0)    | 2 (3.8)    | 4 (7.7)    | 2 (3.8)   | 1 (1.9)    | 4 (7.7)   | 0 (0)   | 3 (5.8)   |
| Mali         | A2 | 0 (0.0)    | 6 (11.2)   | 0 (0.0)  | 3 (5.8)    | 6 (11.5)   | 3 (5.8)   | 1 (2.6)    | 4 (8.7)   | 0 (0.0) | 3 (5.8)   |
| Mali         | A3 | 0 (0.0)    | 8 (15.4)   | 0 (0.0)  | 4 (7.7)    | 8 (15.4)   | 4 (7.7)   | 2 (3.8)    | 5 (9.6)   | 0 (0.0) | 3 (5.8)   |
| Mozambique   | A1 | 0 (0)      | 39 (27.3)  | 0 (0)    | 2 (1.4)    | 1 (0.7)    | 7 (4.9)   | 2 (1.4)    | 3 (2.1)   | 0 (0)   | 2 (1.4)   |
| Mozambique   | A2 | 1 (0.8)    | 56 (39.4)  | 0 (0.3)  | 7 (4.8)    | 7 (4.7)    | 11 (7.9)  | 15 (10.4)  | 9 (6.3)   | 1 (0.9) | 3 (2.0)   |
| Mozambique   | A3 | 3 (2.1)    | 88 (61.5)  | 1 (0.7)  | 21 (14.7)  | 22 (15.4)  | 22 (15.4) | 41 (28.7)  | 27 (18.9) | 5 (3.5) | 6 (4.2)   |
| Sierra Leone | A1 | 0 (0)      | 11 (6.2)   | 0 (0)    | 6 (3.4)    | 17 (9.7)   | 1 (0.6)   | 1 (0.6)    | 0 (0)     | 0 (0)   | 0 (0)     |
| Sierra Leone | A2 | 2 (1.1)    | 38 (21.7)  | 0 (0.3)  | 25 (14.2)  | 50 (28.6)  | 2 (1.2)   | 10 (5.5)   | 15 (8.3)  | 0 (0.1) | 1 (0.3)   |
| Sierra Leone | A3 | 6 (3.4)    | 85 (48.3)  | 1 (0.6)  | 61 (34.7)  | 106 (60.2) | 4 (2.3)   | 25 (14.2)  | 44 (25.0) | 1 (0.6) | 2 (1.1)   |
| South Africa | A1 | 1 (0.5)    | 12 (5.4)   | 0 (0)    | 2 (0.9)    | 13 (5.9)   | 9 (4.1)   | 42 (19.0)  | 1 (0.5)   | 0 (0)   | 0 (0)     |
| South Africa | A2 | 5 (2.1)    | 18 (7.9)   | 0 (0.2)  | 3 (1.5)    | 26 (11.6)  | 15 (6.7)  | 50 (22.7)  | 5 (2.4)   | 0 (0.0) | 0 (0.0)   |
| South Africa | A3 | 10 (4.5)   | 25 (11.3)  | 1 (0.5)  | 6 (2.7)    | 41 (18.6)  | 23 (10.4) | 60 (27.1)  | 10 (4.5)  | 0 (0.0) | 0 (0.0)   |

eTable 6. Number and Proportion of Deaths That Could Have Been Prevented From the Optimal Combinations of Health System Improvement Categories Assuming All Recommendations Given for a Single Death Are Necessary to Prevent That Death by Site and Age Group, December 2016 to December 2021

| Site         | Stillbirth |            | Neonate    |            | Infant/child |            |
|--------------|------------|------------|------------|------------|--------------|------------|
|              | Categories | N (%)      | Categories | N (%)      | Categories   | N (%)      |
| Bangladesh   | B          | 68 (37.2)  | B          | 34 (19.2)  | C            | 1 (25.0)   |
| Bangladesh   | AB         | 86 (47.0)  | AB         | 93 (52.5)  | CE           | 2 (50.0)   |
| Bangladesh   | ABC        | 100 (54.6) | ABC        | 111 (62.7) | CDE          | 2 (50.0)   |
| Bangladesh   | ABCD       | 103 (56.3) | ABCD       | 125 (70.6) | CDEF         | 2 (50.0)   |
| Bangladesh   | ABCDH      | 106 (57.9) | ABCDH      | 129 (72.9) | BCEGH        | 2 (50.0)   |
| Ethiopia     | B          | 9 (4.3)    | A          | 1 (1.0)    | --           | --         |
| Ethiopia     | BC         | 24 (11.6)  | AB         | 12 (11.9)  | AC           | 1 (3.8)    |
| Ethiopia     | ABC        | 43 (20.8)  | ABC        | 24 (23.8)  | ACI          | 2 (7.7)    |
| Ethiopia     | ABCH       | 54 (26.1)  | ABCD       | 39 (38.6)  | ACEF         | 7 (26.9)   |
| Ethiopia     | ABCEH      | 65 (31.4)  | ABCDH      | 46 (45.5)  | ACEFI        | 13 (50.0)  |
| Kenya        | A          | 30 (18.0)  | A          | 42 (24.3)  | A            | 32 (13.4)  |
| Kenya        | AB         | 67 (40.1)  | AB         | 60 (34.7)  | AC           | 61 (25.6)  |
| Kenya        | ABC        | 83 (49.7)  | ABC        | 79 (45.7)  | ACF          | 91 (38.2)  |
| Kenya        | ABCE       | 99 (59.3)  | ABCE       | 94 (54.3)  | ACEF         | 127 (53.4) |
| Kenya        | ABCEG      | 112 (67.1) | ABCEH      | 105 (60.7) | ACEFG        | 140 (58.8) |
| Mali         | B          | 36 (43.9)  | A          | 17 (23.0)  | A            | 4 (7.7)    |
| Mali         | AB         | 45 (54.9)  | AB         | 32 (43.2)  | AE           | 10 (19.2)  |
| Mali         | ABE        | 47 (57.3)  | ABD        | 36 (48.6)  | ACE          | 14 (26.9)  |
| Mali         | ABEJ       | 49 (59.8)  | ABDJ       | 38 (51.4)  | ACEF         | 18 (34.6)  |
| Mali         | ABDEJ      | 49 (59.8)  | ABDEJ      | 39 (52.7)  | ACEFG        | 22 (42.3)  |
| Mozambique   | B          | 110 (43.0) | B          | 78 (30.6)  | A            | 39 (27.3)  |
| Mozambique   | AB         | 125 (48.8) | AB         | 125 (49.0) | AD           | 53 (37.1)  |
| Mozambique   | ABD        | 134 (52.3) | ABD        | 145 (56.9) | ADG          | 64 (44.8)  |
| Mozambique   | ABDJ       | 138 (53.9) | ABDH       | 149 (58.4) | ADFG         | 71 (49.7)  |
| Mozambique   | ABCDJ      | 142 (55.5) | ABDHJ      | 152 (59.6) | ADEFG        | 85 (59.4)  |
| Sierra Leone | A          | 16 (13.3)  | A          | 23 (18.5)  | E            | 17 (9.7)   |
| Sierra Leone | AB         | 57 (47.5)  | AB         | 61 (49.2)  | AE           | 43 (24.4)  |
| Sierra Leone | ABC        | 76 (63.3)  | ABD        | 72 (58.1)  | ACE          | 72 (40.9)  |
| Sierra Leone | ABCE       | 82 (68.3)  | ABCD       | 80 (64.5)  | ACEF         | 105 (59.7) |
| Sierra Leone | ABCEG      | 83 (69.2)  | ABCDE      | 84 (67.7)  | ACDEF        | 127 (72.2) |
| South Africa | B          | 23 (13.1)  | D          | 141 (32.3) | D            | 42 (19.0)  |
| South Africa | AB         | 30 (17.1)  | BD         | 187 (42.9) | DE           | 62 (28.1)  |
| South Africa | ABG        | 32 (18.3)  | ABD        | 210 (48.2) | ADE          | 79 (35.7)  |
| South Africa | ABCG       | 33 (18.9)  | ABDH       | 217 (49.8) | ADEG         | 94 (42.5)  |
| South Africa | ABCGH      | 34 (19.4)  | ABDFH      | 221 (50.7) | ADEFG        | 104 (47.1) |

A: Improved clinical management and quality of care  
 B: Improved antenatal and obstetric care and management  
 C: Improved health-seeking behavior



D: Improved infection prevention and control  
E: Improved health education [immunizations, preventing malnutrition, diarrhea, malaria, burns, poisoning, etc.]  
F: Improved nutritional support  
G: Improved HIV prevention and control  
H: Improved family planning  
I: Improved use of existing vaccinations  
J: Improved transport system

eTable 7. The Number and Proportion of Deaths for Each of the Top 5 Causes of Death for Each Age Group That Could Have Been Prevented for the Top Combination of 1 to 3 Health System Improvement Categories, Assuming All the Recommendations Given for a Single Death Are Necessary to Prevent That Death and the Death Would Be Prevented When Any Single Cause of Death Was Prevented, December 2016 to December 2021

| Cause of death               | Total deaths | One category              |                        | Two categories            |                        | Three categories          |                        |
|------------------------------|--------------|---------------------------|------------------------|---------------------------|------------------------|---------------------------|------------------------|
|                              |              | Health system improvement | Deaths prevented N (%) | Health system improvement | Deaths prevented N (%) | Health system improvement | Deaths prevented N (%) |
| <i>Stillbirth</i>            |              |                           |                        |                           |                        |                           |                        |
| Perinatal asphyxia/hypoxia   | 952          | B                         | 250 (26)               | AB                        | 400 (42)               | ABC                       | 466 (49)               |
| Congenital birth defects     | 95           | B                         | 6 (6)                  | AB                        | 9 (9)                  | ABC                       | 11 (12)                |
| Other neonatal disorders     | 73           | B                         | 23 (32)                | AB                        | 30 (41)                | ABC                       | 34 (47)                |
| Sepsis                       | 63           | B                         | 11 (17)                | BC                        | 13 (21)                | ABC                       | 15 (24)                |
| Congenital infection         | 49           | B                         | 7 (14)                 | BD                        | 12 (24)                | ABD                       | 15 (31)                |
| <i>Neonate</i>               |              |                           |                        |                           |                        |                           |                        |
| Preterm birth complications  | 588          | D                         | 117 (20)               | BD                        | 177 (30)               | ABD                       | 269 (46)               |
| Perinatal asphyxia/hypoxia   | 487          | B                         | 111 (23)               | AB                        | 260 (53)               | ABD                       | 295 (61)               |
| Sepsis                       | 484          | D                         | 127 (26)               | AD                        | 189 (39)               | ABD                       | 270 (56)               |
| Lower respiratory infections | 203          | D                         | 88 (43)                | BD                        | 101 (50)               | ABD                       | 126 (62)               |
| Meningitis/Encephalitis      | 146          | D                         | 56 (38)                | AD                        | 67 (46)                | ABD                       | 87 (60)                |
| <i>Infant/child</i>          |              |                           |                        |                           |                        |                           |                        |
| Lower respiratory infections | 373          | A                         | 40 (11)                | AD                        | 77 (21)                | ADE                       | 105 (28)               |
| Sepsis                       | 346          | D                         | 37 (11)                | AD                        | 78 (23)                | ADE                       | 110 (32)               |
| Malnutrition                 | 211          | F                         | 10 (5)                 | AF                        | 33 (16)                | AEF                       | 69 (33)                |
| Malaria                      | 180          | A                         | 25 (14)                | AE                        | 45 (25)                | ACE                       | 82 (46)                |
| Anemias                      | 122          | E                         | 13 (11)                | AE                        | 33 (27)                | ACE                       | 53 (43)                |

- A: Improved clinical management and quality of care
- B: Improved antenatal and obstetric care and management
- C: Improved health-seeking behavior
- D: Improved infection prevention and control
- E: Improved health education [immunizations, preventing malnutrition, diarrhea, malaria, burns, poisoning, etc.]
- F: Improved nutritional support
- G: Improved HIV prevention and control
- H: Improved family planning
- I: Improved use of existing vaccinations
- J: Improved transport system

For the top five causes of death across all sites for each age group, we identified the top combinations of one to three health system improvement categories that could have prevented the most deaths. For example, malaria was the fourth most frequently listed cause of death for infants/children across all sites. The top combination of three categories that could have prevented the most malaria deaths among infants/children were improved clinical management, health-seeking behavior, and health education, which could have prevented 47.4% (55/116) of deaths, assuming that for deaths with multiple causes, preventing malaria would prevent the death.

eTable 8. The Number and Proportion of Deaths for Each of the Top 5 Causes of Death for Each Age Group That Could Have Been Prevented for the Top Combination of 1 to 3 Health System Improvement Categories, Assuming All the Recommendations Given for a Single Death Are Necessary to Prevent That Death, With Deaths Weighted by Giving 50% to the Underlying Cause With the Remaining Weight Distributed Evenly Among the Other Causes, December 2016 to December 2021

| Cause of death               | Total deaths | One category              |                        | Two categories            |                        | Three categories          |                        |
|------------------------------|--------------|---------------------------|------------------------|---------------------------|------------------------|---------------------------|------------------------|
|                              |              | Health system improvement | Deaths prevented N (%) | Health system improvement | Deaths prevented N (%) | Health system improvement | Deaths prevented N (%) |
| <i>Stillbirth</i>            |              |                           |                        |                           |                        |                           |                        |
| Perinatal asphyxia/hypoxia   | 889          | B                         | 234 (26)               | AB                        | 376 (42)               | ABC                       | 437 (49)               |
| Congenital birth defects     | 84           | B                         | 4 (5)                  | BC                        | 6 (7)                  | BCF                       | 9 (11)                 |
| Sepsis                       | 56           | B                         | 10 (18)                | BD                        | 12 (22)                | ABD                       | 13 (23)                |
| Congenital infection         | 42           | B                         | 6 (14)                 | BD                        | 11 (26)                | ABD                       | 14 (33)                |
| Other neonatal disorders     | 39           | B                         | 12 (29)                | AB                        | 15 (38)                | ABC                       | 17 (44)                |
| <i>Neonate</i>               |              |                           |                        |                           |                        |                           |                        |
| Preterm birth complications  | 410          | D                         | 71 (17)                | BD                        | 111 (27)               | ABD                       | 173 (42)               |
| Perinatal asphyxia/hypoxia   | 352          | B                         | 95 (27)                | AB                        | 200 (57)               | ABD                       | 219 (62)               |
| Sepsis                       | 210          | A                         | 36 (17)                | AD                        | 72 (34)                | ABD                       | 107 (51)               |
| Congenital birth defects     | 91           | B                         | 6 (7)                  | AB                        | 11 (12)                | ABD                       | 16 (17)                |
| Lower respiratory infections | 58           | D                         | 14 (25)                | AD                        | 19 (33)                | ABD                       | 26 (45)                |
| <i>Infant/child</i>          |              |                           |                        |                           |                        |                           |                        |
| Lower respiratory infections | 148          | A                         | 23 (16)                | AC                        | 36 (24)                | ACE                       | 48 (32)                |
| Malaria                      | 119          | A                         | 19 (16)                | AC                        | 34 (29)                | ACE                       | 63 (53)                |
| Sepsis                       | 114          | A                         | 16 (14)                | AD                        | 29 (25)                | ADE                       | 38 (33)                |
| Malnutrition                 | 92           | E                         | 5 (5)                  | EF                        | 14 (16)                | AEF                       | 32 (35)                |
| Diarrheal Diseases           | 64           | A                         | 13 (20)                | AE                        | 21 (32)                | ACE                       | 31 (49)                |

A: Improved clinical management and quality of care  
 B: Improved antenatal and obstetric care and management  
 C: Improved health-seeking behavior  
 D: Improved infection prevention and control  
 E: Improved health education [immunizations, preventing malnutrition, diarrhea, malaria, burns, poisoning, etc.]  
 F: Improved nutritional support  
 G: Improved HIV prevention and control  
 H: Improved family planning  
 I: Improved use of existing vaccinations  
 J: Improved transport system

When weighting deaths using the 50% underlying or causal chain methods, malaria was the second leading cause of death among infants/children. In this example, improved clinical management, health-seeking behavior, and health education were optimal to prevent the most malaria deaths and could have prevented 55.8% (48/86) for the 50% underlying (eTable 2) and 55.2% (48/87) for the causal chain (eTable 3) methods. The estimated number of deaths that would have been prevented were similar between these alternative weighting methods for all causes of death.

eTable 9. The Number and Proportion of Deaths for Each of the Top 5 Causes of Death for Each Age Group That Could Have Been Prevented for the Top Combination of 1 to 3 Health System Improvement Categories, Assuming All the Recommendations Given for a Single Death Are Necessary to Prevent That Death, With Deaths Weighted Using a Causal Chain Approach With Greater Weight Given to Underlying, Comorbid, and Immediate Causes of Death, Respectively, December 2016 to December 2021

| Cause of death               | Total deaths | One category              |                                 | Two categories            |                                 | Three categories          |                                 |
|------------------------------|--------------|---------------------------|---------------------------------|---------------------------|---------------------------------|---------------------------|---------------------------------|
|                              |              | Health system improvement | Deaths prevented N (proportion) | Health system improvement | Deaths prevented N (proportion) | Health system improvement | Deaths prevented N (proportion) |
| <i>Stillbirth</i>            |              |                           |                                 |                           |                                 |                           |                                 |
| Perinatal asphyxia/hypoxia   | 890          | B                         | 234 (26)                        | AB                        | 377 (42)                        | ABC                       | 438 (49)                        |
| Congenital birth defects     | 86           | B                         | 5 (6)                           | BC                        | 7 (8)                           | BCF                       | 10 (11)                         |
| Sepsis                       | 56           | B                         | 10 (17)                         | BD                        | 12 (21)                         | BCD                       | 13 (23)                         |
| Congenital infection         | 43           | B                         | 6 (15)                          | BD                        | 11 (26)                         | ABD                       | 14 (33)                         |
| Other neonatal disorders     | 37           | B                         | 11 (30)                         | AB                        | 14 (39)                         | ABC                       | 17 (45)                         |
| <i>Neonate</i>               |              |                           |                                 |                           |                                 |                           |                                 |
| Preterm birth complications  | 410          | D                         | 71 (17)                         | BD                        | 111 (27)                        | ABD                       | 171 (42)                        |
| Perinatal asphyxia/hypoxia   | 365          | B                         | 97 (27)                         | AB                        | 207 (57)                        | ABD                       | 226 (62)                        |
| Sepsis                       | 188          | A                         | 35 (18)                         | AD                        | 63 (34)                         | ABD                       | 94 (50)                         |
| Congenital birth defects     | 95           | B                         | 7 (7)                           | AB                        | 12 (13)                         | ABD                       | 16 (17)                         |
| Lower respiratory infections | 59           | D                         | 16 (26)                         | AD                        | 20 (34)                         | ABD                       | 27 (46)                         |
| <i>Infant/child</i>          |              |                           |                                 |                           |                                 |                           |                                 |
| Lower respiratory infections | 143          | A                         | 23 (16)                         | AC                        | 35 (25)                         | ACD                       | 47 (33)                         |
| Malaria                      | 122          | A                         | 19 (16)                         | AC                        | 34 (28)                         | ACE                       | 64 (53)                         |
| Malnutrition                 | 98           | F                         | 5 (5)                           | AF                        | 15 (15)                         | AEF                       | 33 (34)                         |
| Sepsis                       | 97           | A                         | 14 (14)                         | AD                        | 25 (26)                         | ADE                       | 33 (34)                         |
| Diarrheal Diseases           | 67           | A                         | 13 (19)                         | AE                        | 21 (31)                         | ACE                       | 32 (47)                         |

A: Improved clinical management and quality of care  
 B: Improved antenatal and obstetric care and management  
 C: Improved health-seeking behavior  
 D: Improved infection prevention and control  
 E: Improved health education [immunizations, preventing malnutrition, diarrhea, malaria, burns, poisoning, etc.]  
 F: Improved nutritional support  
 G: Improved HIV prevention and control  
 H: Improved family planning  
 I: Improved use of existing vaccinations  
 J: Improved transport system

## eMethods. Statistical Analysis

For the three most frequent health system improvement categories for each age group, we identified the 20 most frequent causes of death anywhere in the causal chain for which those categories were recommended to prevent the death. Additionally, for neonates and infants/children we evaluated the proportion of the five most frequent causes of death anywhere in the causal pathway that were deemed preventable by the DeCoDe panel. We also calculated the number of deaths that could have been prevented for the optimal combinations of 1-10 health system improvement categories by month from 2017-2021.

We then explored which combinations of health system improvement categories could have prevented the most deaths for each of the top five causes of death for each age group. For this analysis, we identified the optimal combinations of categories by generating every combination of one to three categories and calculating how many deaths for each of the top five causes could have been prevented for each combination, assuming all categories recommended for a single death are necessary to prevent that death. This analysis also assumed that preventing any single unique cause of death for deaths with multiple causes would prevent the death. In this method every unique cause of death had a weight of one, so deaths with multiple causes had weight greater than one. We also conducted a sensitivity analysis by assigning weights to multiple causes of death. We first used a strategy proposed by Piffaretti<sup>1</sup> that assigns 50% of the weight to the underlying cause with the remaining weight distributed evenly among the other causes. Let  $w_U$  be the weight for the underlying cause,  $w_i$  be the weight for cause  $i$ , and  $m$  be the number of causes, then:  $w_U = 0.5$ ;  $w_i = \frac{1-w_U}{m-1}$ . We also used a novel approach by weighting multiple causes in the causal chain with greater weight given to underlying, comorbid, and immediate causes of death, in that order; the rationale behind this method is that each cause of death in the sequence may predispose the individual to subsequent causes. Let  $c_i$  be the position along the causal chain, then:  $w_i = \frac{(m+1-c_i)}{\sum_{j:c_j \leq m} c_j}$ . The sum of weights for the sensitivity analyses for each death is one. Therefore, these sensitivity analyses assume that for deaths with multiple causes, health system improvement categories would prevent a fraction of deaths depending on the cause's position in the causal chain. An example with four causes of death is shown below:

| Example of weights applied to causes of death for a death with four causes. |              |       |                |              |
|-----------------------------------------------------------------------------|--------------|-------|----------------|--------------|
| Cause of death                                                              | Type         | Equal | 50% Underlying | Causal chain |
| HIV                                                                         | Underlying   | 1     | 0.50           | 0.40         |
| Malaria                                                                     | Antecedent 2 | 1     | 0.17           | 0.30         |
| Anemia                                                                      | Antecedent 1 | 1     | 0.17           | 0.20         |
| Tuberculosis                                                                | Immediate    | 1     | 0.17           | 0.10         |

## Reference

1. Piffaretti C, Moreno-Betancur M, Lamarche-Vadel A, Rey G. Quantifying cause-related mortality by weighting multiple causes of death. *Bull World Health Organ.* 2016;94(12):870-879. doi:10.2471/BLT.16.172189
