# Supplementary material for: Prioritizing Health Care Strategies to Reduce Childhood Mortality
Source: PubMed Central journal article supplement (PMC9587481; doi:10.1001/jamanetworkopen.2022.37689), 2022-10-21
Supplement: jamanetwopen-e2237689-s002.pdf [file jamanetwopen-e2237689-s002.pdf]

\*First name, last name, and suffix (if applicable) are required and will appear in PubMed.

| <b>*Group Name(s): Child Health and Mortality Prevention Surveillance Network</b> |                   |                              |                         |                                                                                                      |                                                 |                                                                |                                                                                                  |
|-----------------------------------------------------------------------------------|-------------------|------------------------------|-------------------------|------------------------------------------------------------------------------------------------------|-------------------------------------------------|----------------------------------------------------------------|--------------------------------------------------------------------------------------------------|
| <b>*First Name and Middle Initial(s)</b>                                          | <b>*Last Name</b> | <b>*Suffix (eg, Jr, III)</b> | <b>Academic Degrees</b> | <b>Institution</b>                                                                                   | <b>Location (city, state/province, country)</b> | <b>Role or Contribution, eg, chair, principal investigator</b> | <b>Group (if more than 1 Group listed in the byline and/or Subgroup (eg, Steering Committee)</b> |
| Ferdousi                                                                          | Begum             |                              | MD                      | Bangabandhu Sheikh Mujib Medical Univ                                                                | Bangladesh                                      | Data collection                                                |                                                                                                  |
| Mohammad Mosiur                                                                   | Rahman            |                              | MD                      | Bangabandhu Sheikh Mujib Medical Univ                                                                | Bangladesh                                      | Data collection                                                |                                                                                                  |
| Mohammed                                                                          | Kamal             |                              | PhD                     | Bangabandhu Sheikh Mujib Medical Univ                                                                | Bangladesh                                      | Data collection                                                |                                                                                                  |
| A.S.M. Nawshad Uddin                                                              | Ahmed             |                              | FCPS                    | Bangladesh Institute of Child Health at Dhaka                                                        | Bangladesh                                      | Data collection                                                |                                                                                                  |
| Mahbubul                                                                          | Hoque             |                              | FCPS                    | Bangladesh Institute of Child Health at Dhaka                                                        | Bangladesh                                      | Data collection                                                |                                                                                                  |
| Kyu Han                                                                           | Lee               |                              | PhD                     | Department of Epidemiology, Johns Hopkins Univ                                                       | Bangladesh                                      | Data collection                                                |                                                                                                  |
| Saria                                                                             | Tasnim            |                              | FCPS                    | Dhaka Community Medical College and Hospital                                                         | Bangladesh                                      | Data collection                                                |                                                                                                  |
| Mahbubur                                                                          | Rahman            |                              | MPH                     | Institute of Epidemiology, Disease Control and Prevention                                            | Bangladesh                                      | Data collection                                                |                                                                                                  |
| Tahmina                                                                           | Shirin            |                              | PhD                     | Institute of Epidemiology, Disease Control and Prevention                                            | Bangladesh                                      | Data collection                                                |                                                                                                  |
| Iqbal Ansary                                                                      | Khan              |                              | MPH                     | Institute of Epidemiology, Disease Control and Prevention                                            | Bangladesh                                      | Data collection                                                |                                                                                                  |
| Meerjady Sabrina                                                                  | Flora             |                              | PhD                     | Institute of Epidemiology, Disease Control and Prevention                                            | Bangladesh                                      | Data collection                                                |                                                                                                  |
| Dilruba                                                                           | Ahmed             |                              | PhD                     | International Centre for Diarrhoeal Disease Research and Control                                     | Bangladesh                                      | Data collection                                                |                                                                                                  |
| K.                                                                                | Zaman             |                              | PhD                     | International Centre for Diarrhoeal Disease Research and Control                                     | Bangladesh                                      | Data collection                                                |                                                                                                  |
| Kazi Munisul                                                                      | Islam             |                              | MPH                     | International Centre for Diarrhoeal Disease Research and Control                                     | Bangladesh                                      | Data collection                                                |                                                                                                  |
| Mohammed Sabbir                                                                   | Ahmed             |                              | MPH                     | International Centre for Diarrhoeal Disease Research and Control                                     | Bangladesh                                      | Data collection                                                |                                                                                                  |
| Mohammed Zahid                                                                    | Hossain           |                              | PhD                     | International Centre for Diarrhoeal Disease Research and Control                                     | Bangladesh                                      | Data collection                                                |                                                                                                  |
| Mustafizur                                                                        | Rahman            |                              | PhD                     | International Centre for Diarrhoeal Disease Research and Control                                     | Bangladesh                                      | Data collection                                                |                                                                                                  |
| Shahana                                                                           | Parveen           |                              |                         | International Centre for Diarrhoeal Disease Research and Control                                     | Bangladesh                                      | Data collection                                                |                                                                                                  |
| Sanwarul                                                                          | Bari              |                              | MD                      | Maternal and Child Health Division, International Centre for Diarrhoeal Disease Research and Control | Bangladesh                                      | Data collection                                                |                                                                                                  |
| Farida                                                                            | Arjuman           |                              | FCPS                    | National Institute of Cancer Research and Control                                                    | Bangladesh                                      | Data collection                                                |                                                                                                  |
| Farzana                                                                           | Islam             |                              | PhD                     | PEI, International Center for Diarrhoeal Disease Research and Control                                | Bangladesh                                      | Data collection                                                |                                                                                                  |
| Ferdousi                                                                          | Islam             |                              | FCPS                    | Popular Medical College and Hospital in Dhaka                                                        | Bangladesh                                      | Data collection                                                |                                                                                                  |
| Joseph O.                                                                         | Oundo             |                              |                         | 1) London School of Hygiene & Tropical Medicine                                                      | Ethiopia                                        | Data collection                                                |                                                                                                  |
| Gunturu                                                                           | Revathi           |                              | MD                      | Aga Khan University Hospital, Nairobi, Kenya                                                         | Kenya                                           | Data collection                                                |                                                                                                  |
| Emily                                                                             | Rogena            |                              | MMED                    | Jomo Kenyatta University of Agriculture and Technology                                               | Kenya                                           | Data collection                                                |                                                                                                  |
| Magdalene                                                                         | Kuria             |                              | MMED                    | Kisumu County Department of Health                                                                   | Kenya                                           | Data collection                                                |                                                                                                  |
| Paul K.                                                                           | Mitei             |                              | MMED                    | Kisumu County Department of Health                                                                   | Kenya                                           | Data collection                                                |                                                                                                  |
| Florence                                                                          | Murila            |                              | MMED                    | University of Nairobi                                                                                | Kenya                                           | Data collection                                                |                                                                                                  |
| Jennifer                                                                          | Verani            |                              | MD                      | CDC Atlanta                                                                                          | U.S.A.                                          | Data collection                                                |                                                                                                  |

## Supplemental Online Content: Nonauthor Collaborators

\*First name, last name, and suffix (if applicable) are required and will appear in PubMed.

| *First Name and Middle Initial(s) | *Last Name  | *Suffix (eg, Jr, III) | Academic Degrees | Institution                                              | Location (city, state/province, country) | Role or Contribution, eg, chair, principal investigator | Group (if more than 1 Group listed in the byline) and/or Subgroup (eg, Steering Committee) |
|-----------------------------------|-------------|-----------------------|------------------|----------------------------------------------------------|------------------------------------------|---------------------------------------------------------|--------------------------------------------------------------------------------------------|
| Doh                               | Sanogo      |                       |                  | Centre pour le Développement des Vaccins                 | Mali                                     | Data collection                                         |                                                                                            |
| Nana                              | Kourouma    |                       |                  | Centre pour le Développement des Vaccins                 | Mali                                     | Data collection                                         |                                                                                            |
| Seydou                            | Sissoko     |                       |                  | Centre pour le Développement des Vaccins                 | Mali                                     | Data collection                                         |                                                                                            |
| Uma U.                            | Onwuchekwu  |                       |                  | Centre pour le Développement des Vaccins                 | Mali                                     | Data collection                                         |                                                                                            |
| Diakaridia                        | Sidibe      |                       |                  | Centre pour le Développement des Vaccins                 | Mali                                     | Data collection                                         |                                                                                            |
| Tatiana                           | Keita       |                       | MD               | Clinique Pasteur, Bamako, Mali                           | Mali                                     | Data collection                                         |                                                                                            |
| Diakaridia                        | Kone        |                       |                  | CSRef Commune I, Bamako, Mali                            | Mali                                     | Data collection                                         |                                                                                            |
| Sharon M.                         | Tennant     |                       | PhD              | University of Maryland School of Medicine                | U.S.A.                                   | Data collection                                         |                                                                                            |
| Carol L.                          | Greene      |                       | MD               | University of Maryland School of Medicine                | U.S.A.                                   | Data collection                                         |                                                                                            |
| J. Kristie                        | Johnson     |                       | PhD              | University of Maryland School of Medicine                | U.S.A.                                   | Data collection                                         |                                                                                            |
| Rima                              | Koka        |                       | MD               | University of Maryland School of Medicine                | U.S.A.                                   | Data collection                                         |                                                                                            |
| Karen D.                          | Fairchild   |                       | MD               | University of Virginia                                   | U.S.A.                                   | Data collection                                         |                                                                                            |
| Sandra                            | Lako        |                       | MPH              | Aberdeen Women's Centre in Freetown                      | Sierra Leone                             | Data collection                                         |                                                                                            |
| Erick                             | Kaluma      |                       | MPH              | Crown Agents                                             | Sierra Leone                             | Data collection                                         |                                                                                            |
| Samuel                            | Pratt       |                       | MPH              | FOCUS 1000                                               | Sierra Leone                             | Data collection                                         |                                                                                            |
| Baindu                            | Kosia       |                       | MPH              | Johns Hopkins Program for International                  | Sierra Leone                             | Data collection                                         |                                                                                            |
| Ruby                              | Fayorsey    |                       | MPH              | ICAP at Columbia University and Harlem                   | Sierra Leone                             | Data collection                                         |                                                                                            |
| Rebecca Alkis                     | Ramirez     |                       | MPH              | Center for Global Health, Centers for Disease            | U.S.A.                                   | Data collection                                         |                                                                                            |
| Rebecca P.                        | Philipsborn |                       | MD               | Department of Pediatrics, Emory University               | U.S.A.                                   | Data collection                                         |                                                                                            |
| Mischka                           | Garel       |                       | MPH              | Emory Global Health Institute, Emory University          | U.S.A.                                   | Data collection                                         |                                                                                            |
| Navit T.                          | Salzberg    |                       | MPH              | Emory Global Health Institute, Emory University          | U.S.A.                                   | Data collection                                         |                                                                                            |
| Jeffrey P.                        | Koplan      |                       | MD               | Emory Global Health Institute, Emory University          | U.S.A.                                   | Data collection                                         |                                                                                            |
| Robert F.                         | Breiman     |                       | MD               | Emory Global Health Institute, Emory University          | U.S.A.                                   | Data collection                                         |                                                                                            |
| Jana M.                           | Ritter      |                       | DVM              | Infectious Diseases Pathology Branch, Division of        | U.S.A.                                   | Data collection                                         |                                                                                            |
| Joy                               | Gary        |                       | DVM              | Infectious Diseases Pathology Branch, Division of        | U.S.A.                                   | Data collection                                         |                                                                                            |
| Sherif R. (deceased)              | Zaki        |                       | MD               | Infectious Diseases Pathology Branch, Division of        | U.S.A.                                   | Data collection                                         |                                                                                            |
| Jennifer R.                       | Verani      |                       | MD               | National Center for Immunization and Respiratory         | U.S.A.                                   | Data collection                                         |                                                                                            |
| Jacob                             | Witherbee   |                       |                  | National Center for Immunization and Respiratory         | U.S.A.                                   | Data collection                                         |                                                                                            |
| Lucy                              | Liu         |                       | MBA              | Public Health Informatics Institute at the University of | U.S.A.                                   | Data collection                                         |                                                                                            |
| Shailesh                          | Nair        |                       | MPH              | Public Health Informatics Institute, The University of   | U.S.A.                                   | Data collection                                         |                                                                                            |
| Jonas M.                          | Winchell    |                       | PhD              | Respiratory Diseases Branch, Division of                 | U.S.A.                                   | Data collection                                         |                                                                                            |

## Supplemental Online Content: Nonauthor Collaborators

\*First name, last name, and suffix (if applicable) are required and will appear in PubMed.

| *First Name and Middle Initial(s) | *Last Name  | *Suffix (eg, Jr, III) | Academic Degrees | Institution                                               | Location (city, state/province, country) | Role or Contribution, eg, chair, principal investigator | Group (if more than 1 Group listed in the byline) and/or Subgroup (eg, Steering Committee) |
|-----------------------------------|-------------|-----------------------|------------------|-----------------------------------------------------------|------------------------------------------|---------------------------------------------------------|--------------------------------------------------------------------------------------------|
| Joseph O.                         | Oundo       |                       | PhD              | 1) London School of Hygiene & Tropical Medicine           | Ethiopia                                 | Decode Panel                                            |                                                                                            |
| Fikremeleket                      | Temesgen    |                       | MD               | Addis Ababa University                                    | Ethiopia                                 | Decode Panel                                            |                                                                                            |
| Melisachew Mulatu                 | Yeshi       |                       | MD               | Ayder Specialized Comprehensive Hospital                  | Ethiopia                                 | Decode Panel                                            |                                                                                            |
| Addisu                            | Alemu       |                       | MD               | College of Health and Medical Sciences at Addis Ababa     | Ethiopia                                 | Decode Panel                                            |                                                                                            |
| Alexander M.                      | Ibrahim     |                       | MD               | College of Health and Medical Sciences at Addis Ababa     | Ethiopia                                 | Decode Panel                                            |                                                                                            |
| Tadesse                           | Gure        |                       | MD               | College of Health and Medical Sciences at Addis Ababa     | Ethiopia                                 | Decode Panel                                            |                                                                                            |
| Stian                             | Orlien      |                       | PhD              | London School of Hygiene & Tropical Medicine              | Ethiopia                                 | Decode Panel                                            |                                                                                            |
| Solomon                           | Ali         |                       | PhD              | National Data Management Centre at the Addis Ababa        | Ethiopia                                 | Decode Panel                                            |                                                                                            |
| Yunus                             | Edrid       |                       | MD               | National Data Management Centre at the Addis Ababa        | Ethiopia                                 | Decode Panel                                            |                                                                                            |
| Mahlet Abayneh                    | Gizaw       |                       | MD               | St. Paul's Hospital Millennium Medical Centre             | Ethiopia                                 | Decode Panel                                            |                                                                                            |
| Fentabil                          | Getnet      |                       | PhD              | Ethiopian Public Health Institute                         | Ethiopia                                 | Decode Panel                                            |                                                                                            |
| Surafel                           | Fentaw      |                       | Mphil            | Ethiopian Public Health Institute                         | Ethiopia                                 | Decode Panel                                            |                                                                                            |
| Celso                             | Monjane     |                       | MD               | Instituto Nacional de Saúde (INS) in Maputo               | Mozambique                               | Data collection                                         |                                                                                            |
| Sheila                            | Nhachungue  |                       | MD               | Instituto Nacional de Saúde (INS) in Maputo               | Mozambique                               | Data collection                                         |                                                                                            |
| Clara                             | Menendez    |                       | PhD              | 1) ISGlobal; 2) Centro de Investigação em Saúde de Maputo | Mozambique                               | Data collection                                         |                                                                                            |
| Justina                           | Bramugy     |                       | MD               | Centro de Investigação em Saúde de Maputo                 | Mozambique                               | Data collection                                         |                                                                                            |
| Milton                            | Kindcardett |                       | MD               | Centro de Investigação em Saúde de Maputo                 | Mozambique                               | Data collection                                         |                                                                                            |
| Tacilita                          | Nhamossa    |                       | PhD              | Centro de Investigação em Saúde de Maputo                 | Mozambique                               | Data collection                                         |                                                                                            |
| Ariel                             | Nhacolo     |                       | MSc              | Centro de Investigação em Saúde de Maputo                 | Mozambique                               | Data collection                                         |                                                                                            |
| Khátia                            | Munguambe   |                       | PhD              | Centro de Investigação em Saúde de Maputo                 | Mozambique                               | Data collection                                         |                                                                                            |
| Pio                               | Vitorino    |                       | MSc              | Centro de Investigação em Saúde de Maputo                 | Mozambique                               | Data collection                                         |                                                                                            |
| Carla                             | Carrilho    |                       | Phd              | Department of Pathology, Maputo Central Hospital          | Mozambique                               | Data collection                                         |                                                                                            |
| Fabiola                           | Fernandes   |                       | PhD              | Department of Pathology, Maputo Central Hospital          | Mozambique                               | Data collection                                         |                                                                                            |
| Sibone                            | Mocumbi     |                       | PhD              | Eduarado Mondlane University and Maputo                   | Mozambique                               | Data collection                                         |                                                                                            |
| Maria                             | Maixenchs   |                       | PhD              | IS Global Hospital Clinic--Universitat de Barcelona       | Mozambique                               | Data collection                                         |                                                                                            |
| Juan Carlos                       | Hurtado     |                       | MD               | ISGlobal - Barcelona Spain                                | Mozambique                               | Data collection                                         |                                                                                            |
| Jaume                             | Ordi        |                       | PhD              | ISGlobal - Hospital Clínic, Universitat de Barcelona      | Mozambique                               | Data collection                                         |                                                                                            |
| Marta                             | Valente     |                       | MD               | ISGlobal Hospital Clinic at Universitat de Barcelona      | Mozambique                               | Data collection                                         |                                                                                            |
| Natalia                           | Rakislova   |                       | PhD              | ISGlobal; Department of Pathology, Hospital               | Mozambique                               | Data collection                                         |                                                                                            |
| Dercio                            | Chitungo    |                       | MD               | Quelimane Central Hospital                                | Mozambique                               | Data collection                                         |                                                                                            |
| Zara                              | Manhique    |                       | MD               | Quelimane Central Hospital                                | Mozambique                               | Data collection                                         |                                                                                            |

Supplemental Online Content: Nonauthor Collaborators

\*First name, last name, and suffix (if applicable) are required and will appear in PubMed.

| *First Name and Middle Initial(s) | *Last Name | *Suffix (eg, Jr, III) | Academic Degrees | Institution                               | Location (city, state/province, country) | Role or Contribution, eg, chair, principal investigator | Group (if more than 1 Group listed in the byline) and/or Subgroup (eg, Steering Committee) |
|-----------------------------------|------------|-----------------------|------------------|-------------------------------------------|------------------------------------------|---------------------------------------------------------|--------------------------------------------------------------------------------------------|
| Yasmin                            | Adam       |                       | MD               | 1) Department of Obstetrics & Gynaecology | South Africa                             | Data collection                                         |                                                                                            |
| Sanjay G.                         | Lala       |                       | MD               | Department of Paediatrics and Perinatal   | South Africa                             | Data collection                                         |                                                                                            |
| Karen L.                          | Petersen   |                       | MD               | Department of Paediatrics, Chris Hani Ba  | South Africa                             | Data collection                                         |                                                                                            |
| Peter J.                          | Swart      |                       | MD               | National Health for Laboratory Service in | South Africa                             | Data collection                                         |                                                                                            |
| Martin                            | Hale       |                       | MD               | National Health Laboratory Service, Depa  | South Africa                             | Data collection                                         |                                                                                            |
| Jeannette                         | Wadula     |                       | MD               | National Health Laboratory Service, Depa  | South Africa                             | Data collection                                         |                                                                                            |
| Noluthando                        | Dludlu     |                       | BCMP             | South African Council Vaccines and Infec  | South Africa                             | Data collection                                         |                                                                                            |
| Fatima                            | Solomon    |                       | MD               | South African Medical Research Council \  | South Africa                             | Data collection                                         |                                                                                            |
| Richard                           | Chawana    |                       | PhD              | South African Medical Research Council \  | South Africa                             | Data collection                                         |                                                                                            |
| Hennie                            | Lombaard   |                       | MD               | University of Witwatersrand, Johannesbu   | South Africa                             | Data collection                                         |                                                                                            |
| Gillian                           | Sorour     |                       | MD               | Wits Health Consortium                    | South Africa                             | Data collection                                         |                                                                                            |
| Constance                         | Ntuli      |                       | Auxillary nur    | South African Council Vaccines and Infec  | South Africa                             | Data collection                                         |                                                                                            |
